# Supplementary material for: Psychological Interventions and Bariatric Surgery among People with Clinically Severe Obesity—A Systematic Review with Bayesian Meta-Analysis
Source: Nutrients. 2022 Apr 12;14(8):1592. doi: 10.3390/nu14081592 (PMC9024573; doi:10.3390/nu14081592)

## **Psychological interventions and bariatric surgery among people with clinically severe obesity - a systematic review with Bayesian meta-analysis**

**A short title:** Psychological interventions and bariatric surgery

Dawid Storman<sup>1,2</sup>, Mateusz J Swierz<sup>1,2</sup>, Monika Storman<sup>2,3</sup>, Katarzyna W Jasinska<sup>4</sup>, Pawel Jemioło<sup>5</sup>, Malgorzata M Bala<sup>1,2</sup>

<sup>1</sup>Department of Hygiene and Dietetics, Chair of Epidemiology and Preventive Medicine, Jagiellonian University Medical College, Krakow, Poland

<sup>2</sup>Systematic Reviews Unit, Jagiellonian University Medical College, Krakow, Poland

<sup>3</sup>Department of Diabetology and Internal Medicine, Medical University of Warsaw, Poland

<sup>4</sup>Students' Scientific Research Group, Systematic Reviews Unit – Polish Cochrane Branch, Jagiellonian University Medical College, Krakow, Poland

<sup>5</sup>AGH University of Science and Technology, al. Mickiewicza 30, 30-059, Krakow, Poland

Dawid Storman – [dawid.storman@doctoral.uj.edu.pl](mailto:dawid.storman@doctoral.uj.edu.pl)

Mateusz J Swierz – [mateusz.swierz@doctoral.uj.edu.pl](mailto:mateusz.swierz@doctoral.uj.edu.pl)

Monika Storman - [monika.storman@wp.pl](mailto:monika.storman@wp.pl)

Katarzyna W Jasinska - [katarzyna.jasinska100@gmail.com](mailto:katarzyna.jasinska100@gmail.com)

Pawel Jemioło - [pawljmlo@agh.edu.pl](mailto:pawljmlo@agh.edu.pl)

Malgorzata M Bala - [malgorzata.1.bala@uj.edu.pl](mailto:malgorzata.1.bala@uj.edu.pl)

**Corresponding author:** Malgorzata M Bala

Chair of Epidemiology and Preventive Medicine, Jagiellonian University Medical College, Krakow, Poland

Address: Kopernika 7 31-034 Krakow, Poland

Phone: +48 12 422 37 20

e-mail: malgorzata.1.bala@uj.edu.pl

## Appendices

Supplementary Materials, Table S1: The PRISMA checklist

Supplementary Materials, Table S2: Search strategies

Supplementary Materials, Table S3: List of ongoing studies

Supplementary Materials, Table S4: Included studies

Supplementary Materials, Table S5: List of excluded studies

Supplementary Materials, Figure S1: Graphical presentation of review authors' judgements about each risk of bias item for each included study

Supplementary Materials, Figure S2: Review authors' judgements about each risk of bias item presented as percentages across all included studies.

Supplementary Materials, Figure S3: Comparison between psychological intervention versus any control in the change of BMI at 6-12 months follow-up

Supplementary Materials, Figure S4: Comparison between psychological intervention versus any control in the change of BMI at 1-2 years follow-up

Supplementary Materials, Table S6: Results from random-effects meta-analyses

Supplementary Materials, Figure S5: Comparison between psychological intervention versus any control in the WL at 6-12 months follow-up

Supplementary Materials, Figure S6: Comparison between psychological intervention versus any control in the WL at 1-2 years follow-up

Supplementary Materials, Table S7: Psychosocial outcomes

Supplementary Materials, Figure S7: Subgroup analyses

Supplementary Materials, Table S1: The PRISMA checklist

| Section/topic             | # | Checklist item                                                                                                                                                                                                                                                                                              | Reported on page # |
|---------------------------|---|-------------------------------------------------------------------------------------------------------------------------------------------------------------------------------------------------------------------------------------------------------------------------------------------------------------|--------------------|
| <b>TITLE</b>              |   |                                                                                                                                                                                                                                                                                                             |                    |
| Title                     | 1 | Identify the report as a systematic review, meta-analysis, or both.                                                                                                                                                                                                                                         | 1                  |
| <b>ABSTRACT</b>           |   |                                                                                                                                                                                                                                                                                                             |                    |
| Structured summary        | 2 | Provide a structured summary including, as applicable: background; objectives; data sources; study eligibility criteria, participants, and interventions; study appraisal and synthesis methods; results; limitations; conclusions and implications of key findings; systematic review registration number. | 3-5                |
| <b>INTRODUCTION</b>       |   |                                                                                                                                                                                                                                                                                                             |                    |
| Rationale                 | 3 | Describe the rationale for the review in the context of what is already known.                                                                                                                                                                                                                              | 5-8                |
| Objectives                | 4 | Provide an explicit statement of questions being addressed with reference to participants, interventions, comparisons, outcomes, and study design (PICOS).                                                                                                                                                  | 7-8                |
| <b>METHODS</b>            |   |                                                                                                                                                                                                                                                                                                             |                    |
| Protocol and registration | 5 | Indicate if a review protocol exists, if and where it can be accessed (e.g., Web address), and, if available, provide registration information including registration number.                                                                                                                               | 8                  |
| Eligibility criteria      | 6 | Specify study characteristics (e.g., PICOS, length of follow-up) and report characteristics (e.g., years considered, language, publication status) used as criteria for eligibility, giving rationale.                                                                                                      | 8-10               |

|                                    |    |                                                                                                                                                                                                                        |                                         |
|------------------------------------|----|------------------------------------------------------------------------------------------------------------------------------------------------------------------------------------------------------------------------|-----------------------------------------|
| Information sources                | 7  | Describe all information sources (e.g., databases with dates of coverage, contact with study authors to identify additional studies) in the search and date last searched.                                             | 10                                      |
| Search                             | 8  | Present full electronic search strategy for at least one database, including any limits used, such that it could be repeated.                                                                                          | Supplementary Materials A               |
| Study selection                    | 9  | State the process for selecting studies (i.e., screening, eligibility, included in systematic review, and, if applicable, included in the meta-analysis).                                                              | 10-11                                   |
| Data collection process            | 10 | Describe method of data extraction from reports (e.g., piloted forms, independently, in duplicate) and any processes for obtaining and confirming data from investigators.                                             | 11                                      |
| Data items                         | 11 | List and define all variables for which data were sought (e.g., PICOS, funding sources) and any assumptions and simplifications made.                                                                                  | 11                                      |
| Risk of bias in individual studies | 12 | Describe methods used for assessing risk of bias of individual studies (including specification of whether this was done at the study or outcome level), and how this information is to be used in any data synthesis. | 11-12                                   |
| Summary measures                   | 13 | State the principal summary measures (e.g., risk ratio, difference in means).                                                                                                                                          | 12-13                                   |
| Synthesis of results               | 14 | Describe the methods of handling data and combining results of studies, if done, including measures of consistency (e.g., $I^2$ ) for each meta-analysis.                                                              | 12                                      |
|                                    |    |                                                                                                                                                                                                                        |                                         |
| Section/topic                      | #  | Checklist item                                                                                                                                                                                                         | Reported on page #                      |
| Risk of bias across studies        | 15 | Specify any assessment of risk of bias that may affect the cumulative evidence (e.g., publication bias, selective reporting within studies).                                                                           | 13                                      |
| Additional analyses                | 16 | Describe methods of additional analyses (e.g., sensitivity or subgroup analyses, meta-regression), if done, indicating which were pre-specified.                                                                       | 13                                      |
| <b>RESULTS</b>                     |    |                                                                                                                                                                                                                        |                                         |
| Study selection                    | 17 | Give numbers of studies screened, assessed for eligibility, and included in the review, with reasons for exclusions at each stage, ideally with a flow diagram.                                                        | 13, Supplementary Materials D, Figure 1 |
| Study characteristics              | 18 | For each study, present characteristics for which data were extracted (e.g., study size, PICOS, follow-up period) and provide the citations.                                                                           | Table 1, Supplementary Materials C      |
| Risk of bias within studies        | 19 | Present data on risk of bias of each study and, if available, any outcome level assessment (see item 12).                                                                                                              | Supplementary Materials C               |
| Results of individual studies      | 20 | For all outcomes considered (benefits or harms), present, for each study: (a) simple summary data for each intervention group (b) effect estimates and confidence intervals, ideally with a forest plot.               | Table 2,                                |
| Synthesis of results               | 21 | Present results of each meta-analysis done, including confidence intervals and measures of consistency.                                                                                                                | Table 3, Supplementary Materials F,G    |

|                             |    |                                                                                                                                                                                      |                                     |
|-----------------------------|----|--------------------------------------------------------------------------------------------------------------------------------------------------------------------------------------|-------------------------------------|
| Risk of bias across studies | 22 | Present results of any assessment of risk of bias across studies (see Item 15).                                                                                                      | Figure 2, Supplementary Materials E |
| Additional analysis         | 23 | Give results of additional analyses, if done (e.g., sensitivity or subgroup analyses, meta-regression [see Item 16]).                                                                | Supplementary Materials H           |
| <b>DISCUSSION</b>           |    |                                                                                                                                                                                      |                                     |
| Summary of evidence         | 24 | Summarize the main findings including the strength of evidence for each main outcome; consider their relevance to key groups (e.g., healthcare providers, users, and policy makers). | 22                                  |
| Limitations                 | 25 | Discuss limitations at study and outcome level (e.g., risk of bias), and at review-level (e.g., incomplete retrieval of identified research, reporting bias).                        | 23                                  |
| Conclusions                 | 26 | Provide a general interpretation of the results in the context of other evidence, and implications for future research.                                                              | 25-26                               |
| <b>FUNDING</b>              |    |                                                                                                                                                                                      |                                     |
| Funding                     | 27 | Describe sources of funding for the systematic review and other support (e.g., supply of data); role of funders for the systematic review.                                           | 2                                   |

|                                                             |
|-------------------------------------------------------------|
| <b>Supplementary Materials, Table S2: Search strategies</b> |
| <b>1 MEDLINE search strategy</b>                            |
| 1. exp obesity/                                             |
| 2. Overweight/                                              |
| 3. over?weight.ti,ab.                                       |
| 4. over weight.ti,ab.                                       |
| 5. overeating.ti,ab.                                        |
| 6. over?eating.ti,ab.                                       |
| 7. or/1-6                                                   |
| 8. exp Weight Loss/                                         |
| 9. weight loss.ti,ab.                                       |
| 10. weight reduc\$.ti,ab.                                   |
| 11. Weight loss surg\$.ti,ab.                               |
| 12. Weight reduc surg\$.ti,ab.                              |
| 13. bariatric surg\$.ti,ab.                                 |
| 14. exp bariatric surgery/                                  |
| 15. (surg\$ adj5 bariatric).ti,ab.                          |
| 16. anti?obesity surg\$.ti,ab.                              |
| 17. antiobesity surg\$.ti,ab.                               |

|                                                                                                                      |
|----------------------------------------------------------------------------------------------------------------------|
| 18. (obesity adj5 surgery).ti,ab.                                                                                    |
| 19. (obesity adj5 surgical).ti,ab.                                                                                   |
| 20. (gastroplasty or gastro?gastostomy or "gastric bypass" or "gastric surgery" or "restrictive surgery").ti,ab.     |
| 21. exp gastric bypass/                                                                                              |
| 22. exp jejunoileal bypass/                                                                                          |
| 23. jejuno?ileal bypass.ti,ab.                                                                                       |
| 24. jejunoileal bypass.ti,ab.                                                                                        |
| 25. gastrointestinal surg\$.ti,ab.                                                                                   |
| 26. gastrointestinal diversion\$.ti,ab.                                                                              |
| 27. exp biliopancreatic diversion/                                                                                   |
| 28. biliopancreatic diversion.ti,ab.                                                                                 |
| 29. bilio?pancreatic diversion.ti,ab.                                                                                |
| 30. biliopancreatic bypass.ti,ab.                                                                                    |
| 31. bilio?pancreatic bypass.ti,ab.                                                                                   |
| 32. gastric band\$.ti,ab.                                                                                            |
| 33. silicon band\$.ti,ab.                                                                                            |
| 34. exp gastroenterostomy/                                                                                           |
| 35. gastrectomy.ti,ab.                                                                                               |
| 36. gastroplasty/                                                                                                    |
| 37. LAGB.ti,ab.                                                                                                      |
| 38. stomach stapl\$.ti,ab.                                                                                           |
| 39. lap band\$.ti,ab.                                                                                                |
| 40. lap-band\$.ti,ab.                                                                                                |
| 41. malabsorptive surg\$.ti,ab.                                                                                      |
| 42. mason\$ procedure.ti,ab.                                                                                         |
| 43. "Roux-en-Y".ti,ab.                                                                                               |
| 44. anastomosis, Roux-en-Y/                                                                                          |
| 45. malabsorptive procedure\$.ti,ab.                                                                                 |
| 46. duodenal switch\$.ti,ab.                                                                                         |
| 47. obesity/su                                                                                                       |
| 48. exp Obesity, Morbid/su [Surgery]                                                                                 |
| 49. or/8-48                                                                                                          |
| 50. psychotherapy.mp. or exp Psychotherapy/ or exp Psychotherapy, Group/ or psychotherapeutic*.mp. or Psychotherapy/ |
| 51. ((psycho* or behav*) adj3 (therap* or treatment* or intervention* or counsel* or support*)).tw.                  |
| 52. supportive expressive group therapy.mp.                                                                          |

|                                                                                                                                                         |
|---------------------------------------------------------------------------------------------------------------------------------------------------------|
| 53. group support*.mp.                                                                                                                                  |
| 54. group intervention*.mp.                                                                                                                             |
| 55. exp Self-Help Groups/ or self-help group*.mp.                                                                                                       |
| 56. exp Counseling/ or counsel.mp.                                                                                                                      |
| 57. counsel*.ti,ab.                                                                                                                                     |
| 58. expressive writing.mp.                                                                                                                              |
| 59. ((behavio?r* or motivation*) adj3 (activation or therap* or treatment* or intervention* or modification* or contract* or program* or counsel*)).tw. |
| 60. (cognitiv* adj3 (therap* or treatment* or intervention* or control* or program*)).tw.                                                               |
| 61. exp Cognitive Therapy/ or cognitive behavioural therapy.mp.                                                                                         |
| 62. (train* adj3 (autogenic or assertive* or mind or sensitivity or relax*)).tw.                                                                        |
| 63. or/50-62                                                                                                                                            |
| 64. 7 and 49 and 63                                                                                                                                     |
| 65. randomized controlled trial.pt.                                                                                                                     |
| 66. controlled clinical trial.pt.                                                                                                                       |
| 67. randomized.ab.                                                                                                                                      |
| 68. placebo.ab.                                                                                                                                         |
| 69. drug therapy.fs.                                                                                                                                    |
| 70. randomly.ab.                                                                                                                                        |
| 71. trial.ab.                                                                                                                                           |
| 72. groups.iab.                                                                                                                                         |
| 73. or/65-72                                                                                                                                            |
| 74. Exp animals/ NOT humans.sh                                                                                                                          |
| 75. 73 NOT 74                                                                                                                                           |
| 76. 64 and 75                                                                                                                                           |

## 2 Embase search strategy

|                                       |
|---------------------------------------|
| 1 exp OBESITY/ or exp MORBID OBESITY/ |
| 2 over?weight.ti,ab.                  |
| 3 over weight.ti,ab.                  |
| 4 overeating.ti,ab.                   |
| 5 over?eating.ti,ab.                  |
| 6 or/1-5                              |
| 7 exp Weight Reduction/               |
| 8 (weight adj1 los*).ti,ab.           |
| 9 (weight adj1 loos*).ti,ab.          |
| 10 weightloss.ti,ab.                  |

|                                                                                                                                                            |
|------------------------------------------------------------------------------------------------------------------------------------------------------------|
| 11 weight?loss.ti,ab.                                                                                                                                      |
| 12 (weight adj3 reduc*).ti,ab.                                                                                                                             |
| 13 weight?reduc*.ti,ab.                                                                                                                                    |
| 14 "bariatric surg*".ti,ab.                                                                                                                                |
| 15 exp Bariatric Surgery/                                                                                                                                  |
| 16 (surg* adj5 bariatric).ti,ab.                                                                                                                           |
| 17 (anti?obesity adj3 surg*).ti,ab.                                                                                                                        |
| 18 (antiobesity adj3 surg*).ti,ab.                                                                                                                         |
| 19 anti obesity surg*.ti,ab.                                                                                                                               |
| 20 (obesity adj5 surgery).ti,ab.                                                                                                                           |
| 21 (obesity adj5 surgical).ti,ab.                                                                                                                          |
| 22 (gastroplasty or gastrogastrostomy or gastro?gastrostomy or gastroenterostomy or "gastric bypass" or "gastric surgery" or "restrictive surgery").ti,ab. |
| 23 exp Stomach Bypass/                                                                                                                                     |
| 24 exp Jejunioleal Bypass/                                                                                                                                 |
| 25 jejuno?ileal bypass.ti,ab.                                                                                                                              |
| 26 jejunoileal bypass.ti,ab.                                                                                                                               |
| 27 gastrointestinal surg*.ti,ab.                                                                                                                           |
| 28 gastrointestinal diversion*.ti,ab.                                                                                                                      |
| 29 (gastro-intestinal adj5 diversion).ti,ab.                                                                                                               |
| 30 exp Biliopancreatic Bypass/                                                                                                                             |
| 31 Biliopancreatic Bypass.ti,ab.                                                                                                                           |
| 32 Biliopancreatic diversion.ti,ab.                                                                                                                        |
| 33 bilio?pancreatic diversion.ti,ab.                                                                                                                       |
| 34 bilio?pancreatic bypass.ti,ab.                                                                                                                          |
| 35 gastric band*.ti,ab.                                                                                                                                    |
| 36 exp Gastric Banding/                                                                                                                                    |
| 37 silicon band*.ti,ab.                                                                                                                                    |
| 38 exp GASTROENTEROSTOMY/                                                                                                                                  |
| 39 gastroenterostomy.ti,ab.                                                                                                                                |
| 40 exp GASTRECTOMY/                                                                                                                                        |
| 41 gastrectomy.ti,ab.                                                                                                                                      |
| 42 exp GASTROPLASTY/                                                                                                                                       |
| 43 LAGB.ti,ab.                                                                                                                                             |
| 44 stomach stapl*.ti,ab.                                                                                                                                   |
| 45 gastric stapl*.ti,ab.                                                                                                                                   |

|                                                                         |
|-------------------------------------------------------------------------|
| 46 lap band*.ti,ab.                                                     |
| 47 lap-band*.ti,ab.                                                     |
| 48 malabsorptive surg*.ti,ab.                                           |
| 49 mason* procedure.ti,ab.                                              |
| 50 "roux-en-Y".ti,ab.                                                   |
| 51 exp Roux y Anastomosis/                                              |
| 52 malabsorpti* procedure*.ti,ab.                                       |
| 53 malabsorpti* surg*.ti,ab.                                            |
| 54 duodenal switch*.ti,ab.                                              |
| 55 or/7-54                                                              |
| 56 6 and 55                                                             |
| 57 OBESITY/su [Surgery]                                                 |
| 58 Morbid Obesity/su [Surgery]                                          |
| 59 57 or 58                                                             |
| 60 6 and 59                                                             |
| 61 56 or 60                                                             |
| 62 psychotherapy.mp. or exp Psychotherapy/ or exp Psychotherapy, Group/ |
| 63 supportive expressive group therapy.mp.                              |
| 64 exp Cognitive Therapy/ or cognitive behavioural therapy.mp.          |
| 65 group support*.mp.                                                   |
| 66 group intervention*.mp.                                              |
| 67 exp Self-Help Groups/ or self-help group*.mp.                        |
| 68 Counseling/ or counsel.mp.                                           |
| 69 counsel*.ti,ab.                                                      |
| 70 expressive writing.mp.                                               |
| 71 psychotherapeutic*.mp. or Psychotherapy/                             |
| 72 adaptation, psychological/                                           |
| 73 or/62-72                                                             |
| 74 61 and 73                                                            |
| 75 Randomized Controlled Trial/                                         |
| 76 Randomization/                                                       |
| 77 Single Blind Procedure/                                              |
| 78 Double Blind Procedure/                                              |
| 79 ((single or doubl* or trebl* or tripl*) adj (mask* or blind*)).tw.   |
| 80 (placebo* and control* and trial*).tw.                               |

|                                                                                                                                                     |
|-----------------------------------------------------------------------------------------------------------------------------------------------------|
| 81 randomi?ed control* trial*.tw.                                                                                                                   |
| 82 (random* adj2 allocat*).tw.                                                                                                                      |
| 83 (placebo* and random* and (trial* or study or studies)).tw.                                                                                      |
| 84 (randomized or randomised).tw.                                                                                                                   |
| 85 Controlled Clinical Trial/                                                                                                                       |
| 86 or/75-85                                                                                                                                         |
| 87 74 AND 86                                                                                                                                        |
| <b>3 The Cochrane Library search strategy</b>                                                                                                       |
| #1 MeSH descriptor: [Obesity] explode all trees                                                                                                     |
| #2 MeSH descriptor: [Overweight] this term only                                                                                                     |
| #3 (obes* or overweight or "over weight")                                                                                                           |
| #4 #1 or #2 or #3                                                                                                                                   |
| #5 MeSH descriptor: [Weight Loss] explode all trees                                                                                                 |
| #6 MeSH descriptor: [Bariatric Surgery] explode all trees                                                                                           |
| #7 (bariatric near/5 surg*)                                                                                                                         |
| #8 (obes* near/5 surg*)                                                                                                                             |
| #9 ((antiobesity or anti-obesity or "anti obesity") near/5 (surg*))                                                                                 |
| #10(gastroplasty or gastrogastrostomy or gastro?gastrostomy or gastroenterostomy or "gastric bypass" or "gastric surgery" or "restrictive surgery") |
| #11 MeSH descriptor: [Gastric Bypass] explode all trees                                                                                             |
| #12 MeSH descriptor: [Jejunioileal Bypass] explode all trees                                                                                        |
| #13 ((jejunoileal or "jejuno-ilial" or "jejuno ilial") next (bypass))                                                                               |
| #14 gastrointestinal next surg*                                                                                                                     |
| #15 gastrointestinal next diversion*                                                                                                                |
| #16 biliopancreatic diversion                                                                                                                       |
| #17 MeSH descriptor: [Biliopancreatic Diversion]                                                                                                    |
| #18 "gastric band"                                                                                                                                  |
| #19 "silicon band"                                                                                                                                  |
| #20 MeSH descriptor: [Gastroenterostomy] explode all trees                                                                                          |
| #21 gastrectomy                                                                                                                                     |
| #22 MeSH descriptor: [Gastroplasty] explode all trees                                                                                               |
| #23 LAGB:ti,ab                                                                                                                                      |
| #24 stomach near/5 stapl*                                                                                                                           |
| #25 gastric near/5 stapl*                                                                                                                           |
| #26 lap next band*                                                                                                                                  |
| #27 mason* next procedure                                                                                                                           |

|                                                                                                                                                                                                 |
|-------------------------------------------------------------------------------------------------------------------------------------------------------------------------------------------------|
| #28 "roux-en-Y"                                                                                                                                                                                 |
| #29 MeSH descriptor: [Anastomosis, Roux-en-Y] explode all trees                                                                                                                                 |
| #30 malabsorpti* next procedure*                                                                                                                                                                |
| #31 malabsorpti* next surg*                                                                                                                                                                     |
| #32 duodenal next switch*                                                                                                                                                                       |
| #33 #5 or #6 or #7 or #8 or #9 or #10 or #11 or #12 or #13 or #14 or #15 or #16 or #17 or #18 or #19 or #20 or #21 or #22 or #23 or #24 or #25 or #26 or #27 or #28 or #29 or #30 or #31 or #32 |
| #34 MeSH descriptor: [Psychotherapy] explode all trees                                                                                                                                          |
| #35 MeSH descriptor: [Psychotherapy, Group] explode all trees                                                                                                                                   |
| #36 MeSH descriptor: [Social Support] explode all trees                                                                                                                                         |
| #37 MeSH descriptor: [Cognitive Therapy] explode all trees                                                                                                                                      |
| #38 MeSH descriptor: [Behavior Therapy] explode all trees                                                                                                                                       |
| #39 MeSH descriptor: [Cognitive Therapy] explode all trees                                                                                                                                      |
| #40 MeSH descriptor: [Counseling] explode all trees                                                                                                                                             |
| #41 psychotherapeutic or CBT or acceptance and commitment therapy or psycho-educational intervention                                                                                            |
| #42 ((psycho* or behav*) near/3 (therap* or treatment* or intervention* or counsel* or support*)):ti,ab,kw                                                                                      |
| #43 ((behavior* or behaviour* or motivation*) near/3 (activation or therap* or treatment* or intervention* or modification* or contract* or program* or counsel*)):ti,ab,kw                     |
| #44 (cognitiv* near/3 (therap* or treatment* or intervention* or control* or program*)):ti,ab,kw                                                                                                |
| #45 (train* near/3 (autogenic or assertive* or mind or sensitivity or relax*)):ti,ab,kw                                                                                                         |
| #46 #34 or #35 or #36 or #37 or #38 or #38 or #39 or #40                                                                                                                                        |
| #47 #4 and #33 and #46                                                                                                                                                                          |
| <b>4 ClinicalTrials</b>                                                                                                                                                                         |
| obesity AND psychological AND EXACT "Interventional" [STUDY-TYPES]                                                                                                                              |
| obesity AND psychology AND EXACT "Interventional" [STUDY-TYPES]                                                                                                                                 |
| obesity AND psychosocial AND EXACT "Interventional" [STUDY-TYPES]                                                                                                                               |
| obesity AND psychotherapy AND EXACT "Interventional" [STUDY-TYPES]                                                                                                                              |
| obesity AND psychotherapeutic AND EXACT "Interventional" [STUDY-TYPES]                                                                                                                          |
| obesity AND cbt                                                                                                                                                                                 |
| obesity AND cognitive behavioral therapy                                                                                                                                                        |
| overweight AND psychological AND EXACT "Interventional" [STUDY-TYPES]                                                                                                                           |
| overweight AND psychology AND EXACT "Interventional" [STUDY-TYPES]                                                                                                                              |
| overweight AND psychosocial AND EXACT "Interventional" [STUDY-TYPES]                                                                                                                            |
| overweight AND psychotherapy AND EXACT "Interventional" [STUDY-TYPES]                                                                                                                           |
| overweight AND psychotherapeutic AND EXACT "Interventional" [STUDY-TYPES]                                                                                                                       |
| overweight AND cbt                                                                                                                                                                              |
| overweight AND cognitive behavioral therapy                                                                                                                                                     |

|                                                                           |
|---------------------------------------------------------------------------|
| overeating AND psychological AND EXACT "Interventional" [STUDY-TYPES]     |
| overeating AND psychology AND EXACT "Interventional" [STUDY-TYPES]        |
| overeating AND psychosocial AND EXACT "Interventional" [STUDY-TYPES]      |
| overeating AND psychotherapy AND EXACT "Interventional" [STUDY-TYPES]     |
| overeating AND psychotherapeutic AND EXACT "Interventional" [STUDY-TYPES] |
| overeating AND cbt                                                        |
| overeating AND cognitive behavioral therapy                               |

|                                                                                                                                                                                                                                                                                                                                                                                                          |
|----------------------------------------------------------------------------------------------------------------------------------------------------------------------------------------------------------------------------------------------------------------------------------------------------------------------------------------------------------------------------------------------------------|
| <b>Supplementary Materials, Table S3: List of ongoing studies</b>                                                                                                                                                                                                                                                                                                                                        |
| <b>American 2012</b><br>American University of Sharfah, Sheikh Khalifa Medical City, Jordan Hospital. Obesity Surgery, Counselling, and Psychological Well-Being. 2012.                                                                                                                                                                                                                                  |
| <b>Conceição 2016</b><br>Conceição E., Machado P., Vaz A., Pinto-Bastos A., Ramalho S., Silva C., et al. 2016. APOLO-Bari, an internet-based program for longitudinal support of bariatric surgery patients: study protocol for a randomized controlled trial. 17(1):114.                                                                                                                                |
| <b>Geisinger 2017</b><br>Geisinger Clinic. Pilot Behavioral Support Intervention After Bariatric Surgery. 2017.                                                                                                                                                                                                                                                                                          |
| <b>Mangieri 2017</b><br>Mangieri C., Johnson R., Choi Y., Wood J., Eisenhower D. 2017. Mobile health applications, do they enhance weight loss efficacy following bariatric surgery. 31, S7.                                                                                                                                                                                                             |
| <b>Mayo 2009</b><br>Mayo Clinic. 2009. Behavior Therapy Prior to Bariatric Surgery. <a href="https://ClinicalTrials.gov/show/NCT01125397">https://ClinicalTrials.gov/show/NCT01125397</a>                                                                                                                                                                                                                |
| <b>National 2016</b><br>National University of Ireland Galway Ireland. 2016. Compassion-Focused Therapy for People With Severe Obesity. <a href="https://ClinicalTrials.gov/show/NCT03249441">https://ClinicalTrials.gov/show/NCT03249441</a>                                                                                                                                                            |
| <b>Owers 2017a</b><br>Owers C., Ackroyd R., Halliday V. 2017. Can structured psychosocial eDUCATion improve health related quality of life outcomes following bariatric surgery?: A pilot study pre-operative management. Obesity Surgery, 27, 831.                                                                                                                                                      |
| <b>Owers 2017b</b><br>Owers C., Halliday V., Ackroyd R. 2017. The effect of improved pre-operative education on the health-related quality of life outcomes following bariatric surgery dragons' den meets shark tank (proposals for randomized controlled trials). Obesity Surgery, 27, 249-50.                                                                                                         |
| <b>Paul 2015</b><br>Paul L., Rongen S., Hoeken D., Deen M., Klaassen R., Biter L., et al. 2015. Does cognitive behavioral therapy strengthen the effect of bariatric surgery for obesity? Design and methods of a randomized and controlled study. 42, 252-6.                                                                                                                                            |
| <b>Sellberg 2018</b><br>[DOI: 10.1186/s12893-018-0358-7; ISRCTN: 16417174]<br>Sellberg F, Possmark S, Ghaderi A, Naslund E, Willmer M, Tynelius P et al. 2018. A dissonance-based intervention for women post roux-en-Y gastric bypass surgery aiming at improving quality of life and physical activity 24 months after surgery: study protocol for a randomized controlled trial. BMC surgery, 18, 25. |
| <b>Sheffield 2013</b><br>Sheffield Teaching Hospitals NHS Foundation Trust. 2013. Psychological Preparation Prior to Bariatric Surgery. <a href="https://ClinicalTrials.gov/show/NCT01670331">https://ClinicalTrials.gov/show/NCT01670331</a> .                                                                                                                                                          |
| <b>Thakker 2017</b><br>Thakker F., Khamkar A., Shah V., Shah S., Shah P. 2017. Digital support group (DSG) better than actual in postoperative management after bariatric surgery Post-operative care. Obesity Surgery, 27, 193.                                                                                                                                                                         |
| <b>University 2013</b><br>University Hospital Grenoble. 2013. Mindfulness in Preparation to Bariatric Surgery. <a href="https://ClinicalTrials.gov/show/NCT02854306">https://ClinicalTrials.gov/show/NCT02854306</a> .                                                                                                                                                                                   |
| <b>University 2013a</b><br>University of Surrey, University College London Hospitals. 2013. The Impact of an Investment Based Intervention on Weight-loss and Beliefs About Food in Patients Post Bariatric Surgery. <a href="https://ClinicalTrials.gov/show/NCT02045628">https://ClinicalTrials.gov/show/NCT02045628</a> .                                                                             |
| <b>University 2017</b><br>University College London. 2017. Evaluation of a Lifestyle Intervention After Bariatric Surgery. <a href="https://ClinicalTrials.gov/show/NCT03214471">https://ClinicalTrials.gov/show/NCT03214471</a> .                                                                                                                                                                       |
| <b>Yale 2014</b><br>Yale University. 2014. Loss of Control Eating Following Weight Loss Surgery. <a href="https://ClinicalTrials.gov/show/NCT02259322">https://ClinicalTrials.gov/show/NCT02259322</a> .                                                                                                                                                                                                 |

| Supplementary Materials, Table S4: Included studies |                                                                                                                                                                                                                                                                                                                                                                                                                                                                                                                                                                                                                                                                                                                                                                                                                                                                                                                                                                                                                                                                                                                                                                                                                                                                                                                                                                                                                                                                                                                                                                                                                                                                                                                                 |
|-----------------------------------------------------|---------------------------------------------------------------------------------------------------------------------------------------------------------------------------------------------------------------------------------------------------------------------------------------------------------------------------------------------------------------------------------------------------------------------------------------------------------------------------------------------------------------------------------------------------------------------------------------------------------------------------------------------------------------------------------------------------------------------------------------------------------------------------------------------------------------------------------------------------------------------------------------------------------------------------------------------------------------------------------------------------------------------------------------------------------------------------------------------------------------------------------------------------------------------------------------------------------------------------------------------------------------------------------------------------------------------------------------------------------------------------------------------------------------------------------------------------------------------------------------------------------------------------------------------------------------------------------------------------------------------------------------------------------------------------------------------------------------------------------|
| <b>Hjelmesæth 2018</b>                              | <p>[ClinicalTrials.gov: NCT01403558]</p> <p>Gade H., Friborg O., Rosenvinge J., Småstuen M., Hjelmesæth J. 2015. The Impact of a Preoperative Cognitive Behavioural Therapy (CBT) on Dysfunctional Eating Behaviours, Affective Symptoms and Body Weight 1 Year after Bariatric Surgery: A Randomised Controlled Trial. <i>Obesity surgery</i>, 25(11), 2112-9.</p> <p>Gade H., Friborg O., Sandbu R., Rosenvinge J., Hjelmesæth J. 2017. Long-term follow-up (4 years) of patients receiving cognitive behavioural therapy (CBT) or usual care before bariatric surgery: A randomized controlled trial. <i>Obesity Facts</i>, 10(1), 38.</p> <p>Gade H., Hjelmesæth J., Rosenvinge J. H., Friborg O. 2014. Effectiveness of a cognitive behavioral therapy for dysfunctional eating among patients admitted for bariatric surgery: a randomized controlled trial. <i>Journal of Obesity</i>, 2014, 1-6. [DOI: 10.1155/2014/127936; Other: NCT01403558]</p> <p>Gade H., Rosenvinge J., Friborg O., Hjelmesæth J. 2013. Cognitive behavioural therapy significantly reduces emotional eating in bariatric surgery patients. A randomised controlled trial. <i>Obesity facts</i>, 6, 30-1.</p> <p>Gade H., Rosenvinge J. H., Hjelmesæth J., Friborg O. 2014. Psychological correlates to dysfunctional eating patterns among morbidly obese patients accepted for bariatric surgery. <i>Obesity Facts</i>, 7(2), 111-9.</p> <p>Hjelmesæth J., Rosenvinge J. H., Gade H., Friborg O. 2018. Effects of cognitive behavioral therapy on eating behaviors, affective symptoms, and weight loss after bariatric surgery: a randomized clinical trial. <i>Obesity Surgery</i>. [DOI: 10.1007/s11695-018-3471-x; Other: NCT01403558]</p> |
| <b>Hollywood 2015</b>                               | <p>[ClinicalTrials.gov: NCT01264120]</p> <p>Hollywood A., Ogden J., Pring C. 2015. The Impact of Psychological Support on Psychological Outcomes and Patients' Experiences of the Bariatric Service 1 and 2 Years after Bariatric Surgery. <i>Journal of Obesity and Bariatrics</i>, 2(1), 1-7.</p> <p>Hollywood A., Ogden J., Pring C. 2012. The impact of a bariatric rehabilitation service on weight loss and psychological adjustment - study protocol. <i>BMC Public Health</i>, 12(1), 275.</p> <p>Ogden J., Hollywood A., Pring C. 2015. The impact of psychological support on weight loss post weight loss surgery: a randomised control trial. <i>Obesity Surgery</i>, 25(3), 500-5.</p> <p>University of Surrey, Western Sussex Hospitals NHS Trust, National Institute for Health Research United Kingdom. 2011. The impact of a bariatric rehabilitation service on patient outcomes. <a href="https://clinicaltrials.gov/ct2/show/NCT01264120">https://clinicaltrials.gov/ct2/show/NCT01264120</a>.</p>                                                                                                                                                                                                                                                                                                                                                                                                                                                                                                                                                                                                                                                                                                          |
| <b>Kalarchian 2012</b>                              | Kalarchian M., Marcus M., Courcoulas A., Cheng Y., Levine M., et al. 2012. Optimizing long-term weight control after bariatric surgery: a pilot study. <i>Surgery for Obesity and Related Diseases</i> , 8(6), 710-5.                                                                                                                                                                                                                                                                                                                                                                                                                                                                                                                                                                                                                                                                                                                                                                                                                                                                                                                                                                                                                                                                                                                                                                                                                                                                                                                                                                                                                                                                                                           |
| <b>Kalarchian 2016</b>                              | <p>[ClinicalTrials.gov: NCT00623792]</p> <p>Kalarchian M., Marcus M., Courcoulas A., Cheng Y., Levine M. 2016. Preoperative lifestyle intervention in bariatric surgery: a randomized clinical trial. <i>Surgery for Obesity and Related Diseases</i>, 12(1), 180-7.</p> <p>Kalarchian M., Marcus M., Courcoulas A., Cheng Y., Levine M. 2013. Preoperative lifestyle intervention in bariatric surgery: initial results from a randomized, controlled trial. <i>Obesity</i>, 21(2), 254-60.</p> <p>Kalarchian M. A., Marcus M. D., Courcoulas A. P., Cheng Y., Levine M. D. 2014. Self-report of gastrointestinal side effects after bariatric surgery. <i>Surgery for Obesity and Related Diseases</i>, 10(6), 1202-7.</p>                                                                                                                                                                                                                                                                                                                                                                                                                                                                                                                                                                                                                                                                                                                                                                                                                                                                                                                                                                                                    |
| <b>Lier 2012</b>                                    | <p>[ClinicalTrials.gov: NCT00635011]</p> <p>Helse F., Helse V. 2008. Pre- and postoperative cognitive behavior therapy for patients accepted for bariatric surgery. <a href="https://clinicaltrials.gov/ct2/show/NCT00635011">https://clinicaltrials.gov/ct2/show/NCT00635011</a>.</p> <p>Lier H. Ø., Biringer E., Eriksen H., Tangen T. 2009. Subjective health complaints in a sample with morbid obesity and the complaints' relation with work ability. <i>European Psychiatry</i>, 24(P02-60), S750.</p> <p>Lier H. Ø., Biringer E., Hove O., Stubhaug B., Tangen T. 2011. Quality of life among patients undergoing bariatric surgery: associations with mental health- A 1 year follow-up study of bariatric surgery patients. <i>Health and Quality of Life Outcomes</i>, 9(1), 79-89.</p> <p>Lier H. Ø., Biringer E., Stubhaug B., Eriksen H. R., Tangen T. 2010. Psychiatric disorders and participation in pre- and postoperative counselling groups in bariatric surgery patients. <i>Obesity Surgery</i>, 21(6), 730-7.</p> <p>Lier H. Ø., Biringer E., Stubhaug B., Tangen T. 2012. The impact of preoperative counseling on postoperative treatment adherence in bariatric surgery patients: a randomized controlled trial. <i>Patient education and counselling</i>, 87(3), 336-42.</p> <p>Lier H., Biringer E., Stubhaug B., Eriksen H. R., Tangen T. 2010. Patient outcome expectancy from bariatric surgery. <i>European Psychiatry</i>, 25(P02-195), 819.</p>                                                                                                                                                                                                                                               |
| <b>Paul 2021</b>                                    | Paul, L., van der Heiden, C., van Hoeken, D., Deen, M., Vlijm, A., Klaassen, R. A., ... & Hoek, H. W. (2021). Cognitive Behavioral Therapy Versus Usual Care Before Bariatric Surgery: One-Year Follow-Up Results of a Randomized Controlled Trial. <i>Obesity Surgery</i> , 31(3), 970-979.                                                                                                                                                                                                                                                                                                                                                                                                                                                                                                                                                                                                                                                                                                                                                                                                                                                                                                                                                                                                                                                                                                                                                                                                                                                                                                                                                                                                                                    |
| <b>Petasne 2013</b>                                 | <p>Petasne Nijamkin M., Campa A., Samiri Nijamkin S., Sosa J. 2013. Comprehensive behavioral-motivational nutrition education improves depressive symptoms following bariatric surgery: a randomized, controlled trial of obese Hispanic Americans. <i>Journal of Nutrition Education and Behavior</i>, 45(6), 620-6.</p> <p>Petasne Nijamkin M., Campa A., Sosa J., Baum M., Himburg S., Johnson P. 2012. Comprehensive nutrition and lifestyle education improves weight loss and physical activity in Hispanic Americans following gastric bypass surgery: a randomized controlled trial. <i>Journal of the Academy of Nutrition and Dietetics</i>, 112(3), 382-90.</p>                                                                                                                                                                                                                                                                                                                                                                                                                                                                                                                                                                                                                                                                                                                                                                                                                                                                                                                                                                                                                                                      |
| <b>Tucker 1991</b>                                  | Tucker J., Samo J., Rand C., Woodward E. 1991. Behavioral interventions to promote adaptive eating behavior and lifestyle changes following surgery for obesity: results of a Two-year outcome evaluation. <i>International Journal of Eating Disorders</i> , 10(6), 689-98.                                                                                                                                                                                                                                                                                                                                                                                                                                                                                                                                                                                                                                                                                                                                                                                                                                                                                                                                                                                                                                                                                                                                                                                                                                                                                                                                                                                                                                                    |
| <b>Wild 2017</b>                                    | <p>[ISRCTN: 11076390]</p> <p>Wild B., Hünнемeyer K., Sauer H., Hain B., Mack I., et al. 2015. A 1-year videoconferencing-based psychoeducational group intervention following bariatric surgery: results of a randomized controlled study. <i>Surgery for Obesity and Related Diseases</i>, 11(6), 1349-60.</p> <p>Wild B., Hünнемeyer K., Sauer H., Schellberg D., Müller-Stich B. P., et al. 2017. Sustained effects of a psychoeducational group intervention following bariatric surgery: Follow-up of the randomized controlled BaSE study. <i>Surgery for Obesity and Related Diseases</i>, 13(9), 1612-8.</p> <p>Wild B., Hünнемeyer K., Sauer H., Teufel M. 2017. Psychotherapeutic interventions following bariatric surgery. Implications from the BaSE study [Psychotherapeutische Interventionen nach Adipositaschirurgie]. <i>Psychotherapeut</i>, 62(3), 222-9.</p>                                                                                                                                                                                                                                                                                                                                                                                                                                                                                                                                                                                                                                                                                                                                                                                                                                               |

## Hjelmesæth 2018

|                                                                                                                                                                                                           |                                                                                                                                                                                                                                                                                                                                                                                                                                                                                                                                                                                                                                                                                                                                                                                                                                                                                                                      |
|-----------------------------------------------------------------------------------------------------------------------------------------------------------------------------------------------------------|----------------------------------------------------------------------------------------------------------------------------------------------------------------------------------------------------------------------------------------------------------------------------------------------------------------------------------------------------------------------------------------------------------------------------------------------------------------------------------------------------------------------------------------------------------------------------------------------------------------------------------------------------------------------------------------------------------------------------------------------------------------------------------------------------------------------------------------------------------------------------------------------------------------------|
| <b>Methods</b>                                                                                                                                                                                            | <p>RCT, parallel assignment, open label, block randomization, with blocks of 4, the allocation ratio was 1:1, descriptive statistics; t-test; chi-square tests; Linear mixed model regression</p> <p>Country: Norway</p> <p>Settings: Senter for sykelig overvekt; Helse Sør-Øst, Sykehuset i Vestfold</p> <p>Number of centers: 1</p> <p>COI: None of the authors has any potential financial conflict of interest related to the manuscript</p> <p>Funding: The first author has been funded by an unrestricted research grant from the South-Eastern Norway Regional Health Authority</p> <p>Protocol registration: <a href="https://clinicaltrials.gov/ct2/show/study/NCT01403558">Clinicaltrials.gov</a>: NCT01403558</p>                                                                                                                                                                                       |
| <b>Participants</b>                                                                                                                                                                                       | <p>Inclusion Criteria: being accepted for BS</p> <p>Exclusion Criteria: suffering from drug and/or alcohol addiction.</p> <p>Number of participants screened: 167</p> <p>Number of participants who met inc&amp;exc criteria: Not reported</p> <p>Number of patients randomized: <u>Intervention</u>: 50, <u>Control</u>: 52</p> <p>Number of patients who underwent bariatric surgery: <u>Intervention</u>: 42, <u>Control</u>: 38</p> <p>Type of bariatric surgery: <u>Intervention</u>: RYGB 36 (85.7%); Sleeve gastrectomy 6 (14.3%) , <u>Control</u>: RYGB 31 (81.6%); Sleeve gastrectomy 7 (18.4%)</p> <p>Number of patients analysed at baseline: <u>Intervention</u>: 42, <u>Control</u>: 38</p> <p>Age mean (SD): <u>Intervention</u>: 44.1 (9.8), <u>Control</u>: 41.2 (9.6)</p> <p>Female N (%): <u>Intervention</u>: 27 (64.3%), <u>Control</u>: 28 (73.7%)</p> <p>Comorbidities N (%): Not reported</p> |
| <b>Interventions</b>                                                                                                                                                                                      | <p><b>Intervention:</b> PreOP CBT for 10weeks</p> <p><b>Control:</b> 10 weeks of nutritional support and education</p>                                                                                                                                                                                                                                                                                                                                                                                                                                                                                                                                                                                                                                                                                                                                                                                               |
| <b>Outcomes</b>                                                                                                                                                                                           | <p>Primary Outcome</p> <ul style="list-style-type: none"> <li>- Changes in eating behaviour and affective symptoms after psychological intervention</li> <li>- Eating behaviours</li> </ul>                                                                                                                                                                                                                                                                                                                                                                                                                                                                                                                                                                                                                                                                                                                          |
| <b>Notes</b>                                                                                                                                                                                              | <p>Tertiary care centre in Norway, September 2011 and December 2013</p>                                                                                                                                                                                                                                                                                                                                                                                                                                                                                                                                                                                                                                                                                                                                                                                                                                              |
| <p>BS – bariatric surgery; CBT, Cognitive-behavioral therapy; COI - Conflict of interest; OP – operation; RCT – randomized controlled trials, RYGB, Roux-en-Y gastric bypass; SD - Standard deviation</p> |                                                                                                                                                                                                                                                                                                                                                                                                                                                                                                                                                                                                                                                                                                                                                                                                                                                                                                                      |

***Risk of bias table***

| <b>Bias</b>                                                                              | <b>Authors' judgement</b> | <b>Support for judgement</b>                                                                                                                                                                                                                                                                                                                                        |
|------------------------------------------------------------------------------------------|---------------------------|---------------------------------------------------------------------------------------------------------------------------------------------------------------------------------------------------------------------------------------------------------------------------------------------------------------------------------------------------------------------|
| Random sequence generation (selection bias)                                              | Low risk                  | Block randomisation with block size of 4; Two research assistants at the treatment centre with no affiliation to the study had access to the randomisation file.                                                                                                                                                                                                    |
| Allocation concealment (selection bias)                                                  | Low risk                  | Two research assistants at the treatment centre with no affiliation to the study had access to the randomisation file                                                                                                                                                                                                                                               |
| Blinding of participants and personnel (performance bias)<br>Weight loss/BMI             | Low risk                  | Objective outcome, no blinding, but the review authors judge that the outcome was not likely to be influenced by lack of blinding                                                                                                                                                                                                                                   |
| Blinding of participants and personnel (performance bias)<br>Psychological outcomes      | High risk                 | Filled out by patients, open study, outcome could be influenced                                                                                                                                                                                                                                                                                                     |
| Blinding of participants and personnel (performance bias)<br>Nonnormative eating pattern | High risk                 | Filled out by patients, open study, outcome could be influenced                                                                                                                                                                                                                                                                                                     |
| Blinding of outcome assessment (detection bias)<br>Weight loss/BMI                       | Low risk                  | Objective outcome, no blinding, but the review authors judge that the outcome was not likely to be influenced by lack of blinding                                                                                                                                                                                                                                   |
| Blinding of outcome assessment (detection bias)<br>Psychological outcomes                | High risk                 | Filled out by patients, open study, outcome could be influenced                                                                                                                                                                                                                                                                                                     |
| Blinding of outcome assessment (detection bias)<br>Nonnormative eating pattern           | High risk                 | Filled out by patients, open study, outcome could be influenced                                                                                                                                                                                                                                                                                                     |
| Incomplete outcome data (attrition bias)                                                 | High risk                 | Reasons for drop-out reported but unclear why not all patients accepted invitation for 1-year follow-up - the characteristics of the subgroup of patients who did not accept invitation was not compared to those who accepted invitation, patients excluded after randomisation, imbalance in numbers of missing patients, unclear characteristics of the subgroup |
| Selective reporting (reporting bias)                                                     | Low risk                  | Outcomes reported as defined in protocol.                                                                                                                                                                                                                                                                                                                           |
| Other bias                                                                               | Low risk                  | None identified                                                                                                                                                                                                                                                                                                                                                     |
| BMI – body mass index                                                                    |                           |                                                                                                                                                                                                                                                                                                                                                                     |

**Hollywood 2015**

|                                                                                                                                                                                                                                                                                                 |                                                                                                                                                                                                                                                                                                                                                                                                                                                                                                                                                                                                                                                                                                                                                                                                                                                                                                                                                                                             |
|-------------------------------------------------------------------------------------------------------------------------------------------------------------------------------------------------------------------------------------------------------------------------------------------------|---------------------------------------------------------------------------------------------------------------------------------------------------------------------------------------------------------------------------------------------------------------------------------------------------------------------------------------------------------------------------------------------------------------------------------------------------------------------------------------------------------------------------------------------------------------------------------------------------------------------------------------------------------------------------------------------------------------------------------------------------------------------------------------------------------------------------------------------------------------------------------------------------------------------------------------------------------------------------------------------|
| <b>Methods</b>                                                                                                                                                                                                                                                                                  | <p>RCT, parallel assignment, open label</p> <p>Country: United Kingdom</p> <p>Settings: St. Richard's Hospital in Chichester, West Sussex</p> <p>Number of centers: 1</p> <p>COI: The authors have no conflict of interest to declare</p> <p>Funding: Funded by RfPB NIHR, Grant number: PBPG-0909-20178. This trial was conducted and data collected with complete independence of the researchers from the RfPB NIHR</p> <p>Protocol registration: <a href="https://clinicaltrials.gov/ct2/show/study/NCT01264120">Clinicaltrials.gov</a>: NCT01264120</p>                                                                                                                                                                                                                                                                                                                                                                                                                                |
| <b>Participants</b>                                                                                                                                                                                                                                                                             | <p>Inclusion Criteria: if they consent, &gt;=18yrs, attended the bariatric clinic at Chichester, accepted for BS, able to pay for BS</p> <p>Exclusion Criteria: no wish to have BS because of not being a suitable patient/able to secure funding from the primary care trust for the surgery, no English skills.</p> <p>Number of participants screened: 206</p> <p>Number of participants who met inc&amp;exc criteria: Not reported</p> <p>Number of patients randomized: <u>Intervention</u>: 82, <u>Control</u>: 80</p> <p>Number of patients who underwent bariatric surgery: <u>Intervention</u>: 82, <u>Control</u>: 80</p> <p>Type of bariatric surgery: RYGB (100%)</p> <p>Number of patients analysed at baseline: <u>Intervention</u>: 82, <u>Control</u>: 80</p> <p>Age mean (SD): <u>Intervention</u>: 45.6 (11.1), <u>Control</u>: 44.8 (10.6)</p> <p>Female N (%): <u>Intervention</u>: 61 (74.4%), <u>Control</u>: 61 (76.2%)</p> <p>Comorbidities N (%): Not reported</p> |
| <b>Interventions</b>                                                                                                                                                                                                                                                                            | <p><b>Intervention:</b> Health psychology-led BRS. CAU+ 3 one-to-one 50-min sessions with a health psychologist 2 weeks preOP, postOP and at 3 mo follow-up.</p> <p><b>CAU:</b> preOP tests and a standard diet sheet postOP</p>                                                                                                                                                                                                                                                                                                                                                                                                                                                                                                                                                                                                                                                                                                                                                            |
| <b>Outcomes</b>                                                                                                                                                                                                                                                                                 | <p>Primary Outcome:</p> <ul style="list-style-type: none"><li>- Change in weight and BMI</li></ul> <p>Secondary Outcome</p> <ul style="list-style-type: none"><li>- Change in psychological measures (QoL, dietary control, coping strategies and emotional eating)</li><li>- Cost-effectiveness</li></ul>                                                                                                                                                                                                                                                                                                                                                                                                                                                                                                                                                                                                                                                                                  |
| <p>BRS - bariatric rehabilitation service; BS – bariatric surgery; CAU - care as usual; CBT - Cognitive-behavioral therapy; COI - Conflict of interest; OP – operation; QoL - Quality of life; RCT – randomized controlled trials, RYGB - Roux-en-Y gastric bypass; SD - Standard deviation</p> |                                                                                                                                                                                                                                                                                                                                                                                                                                                                                                                                                                                                                                                                                                                                                                                                                                                                                                                                                                                             |

***Risk of bias table***

| <b>Bias</b>                                                                              | <b>Authors' judgement</b> | <b>Support for judgement</b>                                                                                                                                                                           |
|------------------------------------------------------------------------------------------|---------------------------|--------------------------------------------------------------------------------------------------------------------------------------------------------------------------------------------------------|
| Random sequence generation (selection bias)                                              | Unclear risk              | No information in publication nor in protocol                                                                                                                                                          |
| Allocation concealment (selection bias)                                                  | Low risk                  | Third-party-blinded randomization                                                                                                                                                                      |
| Blinding of participants and personnel (performance bias)<br>Weight loss/BMI             | Unclear risk              | Objective outcome, assessed in the clinic 2 weeks pre and 12 weeks post - impossible to blind a patient throughout the whole study as he could guess from sessions format in which group he was placed |
| Blinding of participants and personnel (performance bias)<br>Quality of life             | High risk                 | Filled out by patients, open study, outcome could be influenced                                                                                                                                        |
| Blinding of participants and personnel (performance bias)<br>Psychological outcomes      | High risk                 | Filled out by patients, open study, outcome could be influenced                                                                                                                                        |
| Blinding of participants and personnel (performance bias)<br>Nonnormative eating pattern | High risk                 | Filled out by patients, open study, outcome could be influenced                                                                                                                                        |
| Blinding of outcome assessment (detection bias)<br>Weight loss/BMI                       | Unclear risk              | Objective outcome, assessed in the clinic 2 weeks pre and 12 weeks post - impossible to blind a patient throughout the whole study as he could guess from sessions format in which group he was placed |
| Blinding of outcome assessment (detection bias)<br>Quality of life                       | High risk                 | Filled out by patients, open study, outcome could be influenced                                                                                                                                        |
| Blinding of outcome assessment (detection bias)<br>Psychological outcomes                | High risk                 | Filled out by patients, open study, outcome could be influenced                                                                                                                                        |
| Blinding of outcome assessment (detection bias)<br>Nonnormative eating pattern           | High risk                 | Filled out by patients, open study, outcome could be influenced                                                                                                                                        |
| Incomplete outcome data (attrition bias)                                                 | High risk                 | Very low response rate for questionnaires concerning psychological assessment: response rate=43.2%                                                                                                     |
| Selective reporting (reporting bias)                                                     | Low risk                  | Outcomes reported as stated in protocol                                                                                                                                                                |
| Other bias                                                                               | Low risk                  | None identified                                                                                                                                                                                        |
| BMI – body mass index                                                                    |                           |                                                                                                                                                                                                        |

|                                                                                                                                                                                                   |                                                                                                                                                                                                                                                                                                                                                                                                                                                                                                                                                                                                                                                                                                                                                                                                                                                                                                                                                                                                                                                                                                                                                                                                                                                                                                                                                                                                                                                       |
|---------------------------------------------------------------------------------------------------------------------------------------------------------------------------------------------------|-------------------------------------------------------------------------------------------------------------------------------------------------------------------------------------------------------------------------------------------------------------------------------------------------------------------------------------------------------------------------------------------------------------------------------------------------------------------------------------------------------------------------------------------------------------------------------------------------------------------------------------------------------------------------------------------------------------------------------------------------------------------------------------------------------------------------------------------------------------------------------------------------------------------------------------------------------------------------------------------------------------------------------------------------------------------------------------------------------------------------------------------------------------------------------------------------------------------------------------------------------------------------------------------------------------------------------------------------------------------------------------------------------------------------------------------------------|
| <b>Methods</b>                                                                                                                                                                                    | <p>RCT, the Wilcoxon rank sum test, Fisher's exact test, Spearman's correlation</p> <p>Country: United States of America</p> <p>Settings: Not reported</p> <p>Number of centers: Not reported</p> <p>COI: The authors have no commercial associations that might be a conflict of interest in relation to this article</p> <p>Funding: A 2007 Research Grant Award from the American Society for Metabolic and Bariatric Surgery (grant R03DK078562)</p> <p>Protocol registration: Not reported</p>                                                                                                                                                                                                                                                                                                                                                                                                                                                                                                                                                                                                                                                                                                                                                                                                                                                                                                                                                   |
| <b>Participants</b>                                                                                                                                                                               | <p>Patients with a BMI 30 kg/m<sup>2</sup> who had undergone BS 3 years before study entry and had 50% excess WL, &gt;21 yrs if undergone BS ≥3 yrs before study enrolment and lost &lt;50% excess weight from before surgery to study enrolment.</p> <p>Exclusion criteria: BMI &lt;30 kg/m<sup>2</sup>; participation in a weight management program in the last 6 mo; severe psychiatric disorders; pregnancy or lactation in the previous 6 months or planning to become pregnant in the next year; taking a medication known to affect the body weight in the previous 6 mo; mental retardation or psychosis; participation in a conflicting research protocol in the previous 6 mo</p> <p>Number of participants screened: 230</p> <p>Number of participants who met inc&amp;exc criteria: 64</p> <p>Number of patients randomized: <u>Intervention</u>: 18, <u>Control</u>: 18</p> <p>Number of patients who underwent bariatric surgery: <u>Intervention</u>: 18, <u>Control</u>: 18</p> <p>Type of BS: GB (n=29, 80.6%), revision of their primary surgery to a secondary GB (n=4, 11.1%), LAGB (n=2, 5.6%), and VBG (n=1, 2.8%)</p> <p>Number of patients analysed at baseline: <u>Intervention</u>: 18, <u>Control</u>: 18</p> <p>Age mean (SD): <u>Intervention</u>: 51.0 (7.6), <u>Control</u>: 53.9 (6.6)</p> <p>Female N (%): <u>Intervention</u>: 15 (83.3%), <u>Control</u>: 17 (94.4%)</p> <p>Comorbidities N (%): Not reported</p> |
| <b>Interventions</b>                                                                                                                                                                              | <p><b>Intervention:</b> 6-mo behavioural intervention. The patients were prescribed an exercise program according to their choice of activity. The participants were assisted in self-monitoring and setting small, incremental goals for lifestyle change. 12 weekly group meetings (lasted 1 hour) followed by 5 biweekly telephone coaching sessions (15–20 min).</p> <p><b>Control:</b> Wait list control group</p>                                                                                                                                                                                                                                                                                                                                                                                                                                                                                                                                                                                                                                                                                                                                                                                                                                                                                                                                                                                                                               |
| <b>Outcomes</b>                                                                                                                                                                                   | <p>Body weight and height; episodes of binge eating during the previous 6 months; current depressive symptoms</p>                                                                                                                                                                                                                                                                                                                                                                                                                                                                                                                                                                                                                                                                                                                                                                                                                                                                                                                                                                                                                                                                                                                                                                                                                                                                                                                                     |
| <p>BS – bariatric surgery; COI - Conflict of interest; GB - Gastric Bypass; RCT – randomized controlled trials, SD - Standard deviation; VGB - Vertical banded gastroplasty; WL - weight loss</p> |                                                                                                                                                                                                                                                                                                                                                                                                                                                                                                                                                                                                                                                                                                                                                                                                                                                                                                                                                                                                                                                                                                                                                                                                                                                                                                                                                                                                                                                       |

**Risk of bias table**

| Bias                                                                         | Authors' judgement | Support for judgement                                                                                                             |
|------------------------------------------------------------------------------|--------------------|-----------------------------------------------------------------------------------------------------------------------------------|
| Random sequence generation (selection bias)                                  | Unclear risk       | Randomised, no more info                                                                                                          |
| Allocation concealment (selection bias)                                      | Unclear risk       | No information                                                                                                                    |
| Blinding of participants and personnel (performance bias)<br>Weight loss/BMI | Low risk           | Objective outcome, no blinding, but the review authors judge that the outcome was not likely to be influenced by lack of blinding |
| Blinding of outcome assessment (detection bias)<br>Weight loss/BMI           | Low risk           | Objective outcome, no blinding, but the review authors judge that the outcome was not likely to be influenced by lack of blinding |
| Incomplete outcome data (attrition bias)                                     | Unclear risk       | No info what type of analysis used, loss-to-follow-up similar in both groups however reasons for LTFU unreported                  |
| Selective reporting (reporting bias)                                         | High risk          | No protocol, only weight-related outcomes reported                                                                                |
| Other bias                                                                   | Low risk           | None identified                                                                                                                   |
| BMI – body mass index; LTFU – lost to follow-up                              |                    |                                                                                                                                   |

**Kalarchian 2016**

|                     |                                                                                                                                                                                                                                                                                                                                                                                                                                                                                                                                                                                                                                                                                                                                                                                                                                                                                                                                                                                                                                                                                           |
|---------------------|-------------------------------------------------------------------------------------------------------------------------------------------------------------------------------------------------------------------------------------------------------------------------------------------------------------------------------------------------------------------------------------------------------------------------------------------------------------------------------------------------------------------------------------------------------------------------------------------------------------------------------------------------------------------------------------------------------------------------------------------------------------------------------------------------------------------------------------------------------------------------------------------------------------------------------------------------------------------------------------------------------------------------------------------------------------------------------------------|
| <b>Methods</b>      | <p>RCT, parallel assignment, open label, descriptive statistics, t-tests, Wilcoxon tests, chi-square analyses, Fisher's exact tests, linear regression models</p> <p>Country: United States of America</p> <p>Settings: Bariatric Center of Excellence at a large, urban medical center</p> <p>Number of centers: 1</p> <p>COI: Dr. Kalarchian reports receiving funding for research in BS from NIH/NIDDK, TOS/Nutrisystem, and ASMBS. Dr. Courcoulas reports grants from Nutrisystem, grants from EndoGastric Solutions, and other from J&amp;J Ethicon. Drs. Cheng, Levine and Marcus have nothing to disclose</p> <p>Funding: R01DK077102 from the National Institute of Diabetes and Digestive and Kidney Diseases (PI: Melissa A. Kalarchian). The sponsor had no role in the design and conduct of the study; collection, management, analysis, and interpretation of the data; or in the preparation, review, or approval of the manuscript</p> <p>Protocol registration: <a href="https://clinicaltrials.gov/ct2/show/study/NCT00623792">Clinicaltrials.gov</a>: NCT00623792</p> |
| <b>Participants</b> | <p>Inclusion Criteria: at least 18 years old, BMI &gt; 40, or BMI 35- 40 with serious obesity-related health problems</p> <p>Exclusion Criteria: mental retardation or psychosis, previously diagnosed genetic obesity syndrome, participation in a structured weight management program in the 6 mo prior to study enrolment, uncontrolled psychiatric symptomatology sufficiently severe to require immediate treatment, pregnant or lactating in the previous 6 mo, taking a medication known to affect body weight, any previous surgery for WL, deemed high risk surgical candidate.</p> <p>Number of participants screened: 934</p> <p>Number of participants who met inc&amp;exc criteria: 300</p>                                                                                                                                                                                                                                                                                                                                                                                 |

|                                                                                                                                                                                                                          |                                                                                                                                                                                                                                                                                                                                                                                                                                                                                                                                                                                                                                                                                                                       |
|--------------------------------------------------------------------------------------------------------------------------------------------------------------------------------------------------------------------------|-----------------------------------------------------------------------------------------------------------------------------------------------------------------------------------------------------------------------------------------------------------------------------------------------------------------------------------------------------------------------------------------------------------------------------------------------------------------------------------------------------------------------------------------------------------------------------------------------------------------------------------------------------------------------------------------------------------------------|
|                                                                                                                                                                                                                          | <p>Number of patients randomized: <u>Intervention:</u> 121, <u>Control:</u> 119</p> <p>Number of patients who underwent bariatric surgery: <u>Intervention:</u> 71, <u>Control:</u> 72</p> <p>Type of bariatric surgery: <u>Intervention:</u> RYGB - 41, LAGB - 30, <u>Control:</u> RYGB - 46, LAGB - 26</p> <p>Number of patients analysed at baseline: <u>Intervention:</u> 71, <u>Control:</u> 72</p> <p>Age mean (SD): <u>Intervention:</u> 43.9 (10.3), <u>Control:</u> 45.9 (11.6)</p> <p>Female N (%): <u>Intervention:</u> 64 (90.1%), <u>Control:</u> 65 (90.3%)</p> <p>Comorbidities N (%): Not reported</p>                                                                                                |
| <b>Interventions</b>                                                                                                                                                                                                     | <p><b>Intervention:</b> 6-mo, evidence-informed, manualized behavioural lifestyle intervention, a combination of individual, face-to-face counselling sessions and telephone coaching , the first 2 months consisted of 8 weekly individual, face-to-face sessions (each 1 h). Weekly contacts continued for the next 4 months, consisting of one individual, face-to-face session and three telephone coaching sessions per month (15-20 min). Thus, the intervention consisted of a total of 12 individual, face-to-face sessions and 12 telephone contacts.</p> <p><b>Control:</b> Treatment as usual - patients received a synopsis of the information provided to participants in the lifestyle intervention</p> |
| <b>Outcomes</b>                                                                                                                                                                                                          | <p>Primary Outcome Measures: weight and related outcomes (BMI, cardiovascular risk, quality of life), preparation for surgery (eating, activity and knowledge of surgery), compliance and eating problems (vomiting, dumping, plugging etc.), surgical complications and outpatient visits Secondary Outcome Measures: Weight/BMI trajectory</p>                                                                                                                                                                                                                                                                                                                                                                      |
| <p>BMI – body mass index; COI - Conflict of interest; LAGB - Laparoscopic adjustable gastric banding; RCT – randomized controlled trials, RYGB - Roux-en-Y gastric bypass; SD - Standard deviation; WL - weight loss</p> |                                                                                                                                                                                                                                                                                                                                                                                                                                                                                                                                                                                                                                                                                                                       |

#### *Risk of bias table*

| Bias                                                                                     | Authors' judgement | Support for judgement                                                                                                                                                                                                                                                                                                                                                                                       |
|------------------------------------------------------------------------------------------|--------------------|-------------------------------------------------------------------------------------------------------------------------------------------------------------------------------------------------------------------------------------------------------------------------------------------------------------------------------------------------------------------------------------------------------------|
| Random sequence generation (selection bias)                                              | Low risk           | Block randomization with a block size of 4, stratified by BMI; the allocation sequence was generated by the study statistician.                                                                                                                                                                                                                                                                             |
| Allocation concealment (selection bias)                                                  | Unclear risk       | No information                                                                                                                                                                                                                                                                                                                                                                                              |
| Blinding of participants and personnel (performance bias)<br>Weight loss/BMI             | Low risk           | Objective outcome, weight measured with a digital scale at the study office, at 6 months weight was collected from the electronic medical record for participants who were unable to complete the assessment at the study office, height measured with a mounted stadiometer - impossible to blind a patient throughout the whole study as he could guess from sessions format in which group he was placed |
| Blinding of participants and personnel (performance bias)<br>Psychological outcomes      | High risk          | Filled out by patients                                                                                                                                                                                                                                                                                                                                                                                      |
| Blinding of participants and personnel (performance bias)<br>Nonnormative eating pattern | High risk          | Filled out by patients                                                                                                                                                                                                                                                                                                                                                                                      |

|                                                                                |           |                                                                                                                                                                                                                                                                                                                                                                                                             |
|--------------------------------------------------------------------------------|-----------|-------------------------------------------------------------------------------------------------------------------------------------------------------------------------------------------------------------------------------------------------------------------------------------------------------------------------------------------------------------------------------------------------------------|
| Blinding of outcome assessment (detection bias)<br>Weight loss/BMI             | Low risk  | Objective outcome, weight measured with a digital scale at the study office, at 6 months weight was collected from the electronic medical record for participants who were unable to complete the assessment at the study office, height measured with a mounted stadiometer - impossible to blind a patient throughout the whole study as he could guess from sessions format in which group he was placed |
| Blinding of outcome assessment (detection bias)<br>Psychological outcomes      | High risk | Filled out by patients                                                                                                                                                                                                                                                                                                                                                                                      |
| Blinding of outcome assessment (detection bias)<br>Nonnormative eating pattern | High risk | Filled out by patients                                                                                                                                                                                                                                                                                                                                                                                      |
| Incomplete outcome data (attrition bias)                                       | High risk | Per-protocol analysis, Serious loss of follow-up                                                                                                                                                                                                                                                                                                                                                            |
| Selective reporting (reporting bias)                                           | High risk | Protocol available but a few outcomes not reported: total body fat, total lean mass                                                                                                                                                                                                                                                                                                                         |
| Other bias                                                                     | Low risk  | None identified                                                                                                                                                                                                                                                                                                                                                                                             |
| BMI – body mass index                                                          |           |                                                                                                                                                                                                                                                                                                                                                                                                             |

## Lier 2012

|                     |                                                                                                                                                                                                                                                                                                                                                                                                                                                                                                                                                                                                  |
|---------------------|--------------------------------------------------------------------------------------------------------------------------------------------------------------------------------------------------------------------------------------------------------------------------------------------------------------------------------------------------------------------------------------------------------------------------------------------------------------------------------------------------------------------------------------------------------------------------------------------------|
| <b>Methods</b>      | <p>RCT, parallel assignment, open label, analysis of variance, a two way contingency table analysis</p> <p>Country: Norway</p> <p>Settings: Department of Surgery at Hugesund Hospital on the West coast of Norway</p> <p>Number of centers: 1</p> <p>COI: The authors report no conflict of interest. The authors alone are responsible for the content and writing of the paper</p> <p>Funding: Grant from the Western Regional Health Authority, Norway</p> <p>Protocol registration: <a href="https://clinicaltrials.gov/ct2/show/study/NCT00635011">Clinicaltrials.gov: NCT00635011</a></p> |
| <b>Participants</b> | <p>Inclusion Criteria: being on a waiting list for BS at Hugesund hospital</p> <p>Exclusion Criteria: psychosis and suicidality, suicidal attempts the last two years, or suicidal thoughts or plans.</p> <p>Number of participants screened: 169</p>                                                                                                                                                                                                                                                                                                                                            |

|                                                                                                           |                                                                                                                                                                                                                                                                                                                                                                                                                                                                                                                                                                                                                       |
|-----------------------------------------------------------------------------------------------------------|-----------------------------------------------------------------------------------------------------------------------------------------------------------------------------------------------------------------------------------------------------------------------------------------------------------------------------------------------------------------------------------------------------------------------------------------------------------------------------------------------------------------------------------------------------------------------------------------------------------------------|
|                                                                                                           | <p>Number of participants who met inc&amp;exc criteria: 144</p> <p>Number of patients randomized: <u>Intervention</u>: 49, <u>Control</u>: 50</p> <p>Number of patients who underwent bariatric surgery: <u>Intervention</u>: 44, <u>Control</u>: 43</p> <p>Type of bariatric surgery: Gastric bypass (100%)</p> <p>Number of patients analysed at baseline: <u>Intervention</u>: 49, <u>Control</u>: 48</p> <p>Age mean (SD): <u>Intervention</u>: 43.5 (11.1), <u>Control</u>: 42.4 (9.1)</p> <p>Female N (%): <u>Intervention</u>: 36 (74%), <u>Control</u>: 32 (67%)</p> <p>Comorbidities N (%): Not reported</p> |
| <b>Interventions</b>                                                                                      | <p><b>Intervention:</b> Cognitive-behavioral treatment program with one preoperative group session (3h) weekly for six weeks and three postoperative group sessions (about six months, one year and two years after surgery). Homework: diary for food intake, diary for planned and executed exercise, and mindfulness training (20–30 min, six days a week).</p> <p><b>Control:</b> Treatment as usual - two 4-hours educational seminars: one preoperative and one postoperative.</p>                                                                                                                              |
| <b>Outcomes</b>                                                                                           | <p>Primary Outcome Measures: psychiatric comorbidity</p> <p>Secondary Outcome Measures: WL</p>                                                                                                                                                                                                                                                                                                                                                                                                                                                                                                                        |
| COI - Conflict of interest; RCT – randomized controlled trials; SD - Standard deviation; WL - weight loss |                                                                                                                                                                                                                                                                                                                                                                                                                                                                                                                                                                                                                       |

#### *Risk of bias table*

| Bias                                                                                | Authors' judgement | Support for judgement                                           |
|-------------------------------------------------------------------------------------|--------------------|-----------------------------------------------------------------|
| Random sequence generation (selection bias)                                         | Low risk           | Blocked randomization; block size of ten                        |
| Allocation concealment (selection bias)                                             | Low risk           | Concealed at an external research site                          |
| Blinding of participants and personnel (performance bias)<br>Weight loss/BMI        | Unclear risk       | No blinding, open label                                         |
| Blinding of participants and personnel (performance bias)<br>Psychological outcomes | High risk          | Filled out by patients, open study, outcome could be influenced |
| Blinding of outcome assessment (detection bias)<br>Weight loss/BMI                  | Unclear risk       | No blinding, open label                                         |
| Blinding of outcome assessment (detection bias)<br>Psychological outcomes           | High risk          | Filled out by patients, open study, outcome could be influenced |

|                                          |           |                                                                                   |
|------------------------------------------|-----------|-----------------------------------------------------------------------------------|
| Incomplete outcome data (attrition bias) | High risk | Patients excluded after randomisation, 35% of patients excluded from the analysis |
| Selective reporting (reporting bias)     | High risk | QoL missed                                                                        |
| Other bias                               | Low risk  | None identified                                                                   |
| BMI – body mass index                    |           |                                                                                   |

## Paul 2021

|                     |                                                                                                                                                                                                                                                                                                                                                                                                                                                                                                                                                                                                                                                                                                                                                                                                                                                                                                                                                                                                                                                                                                                                    |
|---------------------|------------------------------------------------------------------------------------------------------------------------------------------------------------------------------------------------------------------------------------------------------------------------------------------------------------------------------------------------------------------------------------------------------------------------------------------------------------------------------------------------------------------------------------------------------------------------------------------------------------------------------------------------------------------------------------------------------------------------------------------------------------------------------------------------------------------------------------------------------------------------------------------------------------------------------------------------------------------------------------------------------------------------------------------------------------------------------------------------------------------------------------|
| <b>Methods</b>      | <p>RCT, parallel assignment, open label, t tests and linear mixed models</p> <p>Country: Netherlands</p> <p>Settings: general hospital, Rotterdam, Netherlands</p> <p>Number of centers: 3</p> <p>COI: No conflict of interest was reported by the authors</p> <p>Funding: Not reported</p> <p>Protocol registration: <a href="https://www.trialregister.nl/trial/3960">https://www.trialregister.nl/trial/3960</a></p>                                                                                                                                                                                                                                                                                                                                                                                                                                                                                                                                                                                                                                                                                                            |
| <b>Participants</b> | <p>Patients before BS;</p> <p>Inclusion criteria: successfully passing preoperative screening, being on the waiting list for bariatric surgery in one of the hospitals, age between 21 and 65 years</p> <p>Exclusion criteria: being currently treated by a dietitian, psychiatrist, or psychologist; suffering from psychotic or bipolar disorder, suicidality, or substance addiction; poor command of the Dutch language; being involved in another study on weight and bariatric surgery outcomes</p> <p>Number of participants screened: 213</p> <p>Number of participants who met inc&amp;exc criteria: 130</p> <p>Number of patients randomized: <u>Intervention</u>: 65, <u>Control</u>: 65</p> <p>Number of patients who underwent bariatric surgery: <u>Intervention</u>: 53, <u>Control</u>: 54</p> <p>Type of bariatric surgery: gastric bypass (100%)</p> <p>Number of patients analysed at baseline: <u>Intervention</u>: 65, <u>Control</u>: 65</p> <p>Age mean (SD): <u>Intervention</u>: 44.1 (8.2), <u>Control</u>: 39.3 (10.6)</p> <p>Female N (%): <u>Intervention</u>: 46 (73%), <u>Control</u>: 49 (75%)</p> |

|                                                                                                                      |                                                                                                                                                                                                                                                                                                                                                                                                                            |
|----------------------------------------------------------------------------------------------------------------------|----------------------------------------------------------------------------------------------------------------------------------------------------------------------------------------------------------------------------------------------------------------------------------------------------------------------------------------------------------------------------------------------------------------------------|
|                                                                                                                      | Comorbidities N (%): not reported                                                                                                                                                                                                                                                                                                                                                                                          |
| <b>Interventions</b>                                                                                                 | <p><b>Intervention:</b> cognitive behavioural therapy of 10 individual sessions of 45 minutes, conducted by a psychologist or cognitive behavioural therapeutic worker.</p> <p><b>Control:</b> conventional preparation procedure consisting of an information meeting by the surgeon or nurse practitioner and an information meeting by the dietitian. Patients also receive a detailed patient information booklet.</p> |
| <b>Outcomes</b>                                                                                                      | Weight, eating behaviour, eating disorders, depression, quality of life, psychological distress                                                                                                                                                                                                                                                                                                                            |
| COI - Conflict of interest; EBW - excessive body weight; RCT – randomized controlled trials, SD - Standard deviation |                                                                                                                                                                                                                                                                                                                                                                                                                            |

***Risk of bias table***

| Bias                                                                                     | Authors' judgement | Support for judgement                                                |
|------------------------------------------------------------------------------------------|--------------------|----------------------------------------------------------------------|
| Random sequence generation (selection bias)                                              | Low risk           | An online randomization list (www.randomization.com)                 |
| Allocation concealment (selection bias)                                                  | Low risk           | An independent PsyQ office manager managed the randomization process |
| Blinding of participants and personnel (performance bias)<br>Weight loss/BMI             | Unclear risk       | Objective outcome, open study, outcome could be influenced           |
| Blinding of participants and personnel (performance bias)<br>Psychological outcomes      | High risk          | Open study, outcome could be influenced                              |
| Blinding of participants and personnel (performance bias)<br>Quality of life             | High risk          | Open study, outcome could be influenced                              |
| Blinding of participants and personnel (performance bias)<br>Nonnormative eating pattern | High risk          | Open study, outcome could be influenced                              |
| Blinding of outcome assessment (detection bias)<br>Weight loss/BMI                       | Unclear risk       | Objective outcome, open study, outcome could be influenced           |
| Blinding of outcome assessment (detection bias)<br>Psychological outcomes                | High risk          | Open study, outcome could be influenced                              |
| Blinding of outcome assessment (detection bias)<br>Quality of life                       | High risk          | Open study, outcome could be influenced                              |

|                                                                                |              |                                                                                                                                            |
|--------------------------------------------------------------------------------|--------------|--------------------------------------------------------------------------------------------------------------------------------------------|
| Blinding of outcome assessment (detection bias)<br>Nonnormative eating pattern | High risk    | Open study, outcome could be influenced                                                                                                    |
| Incomplete outcome data (attrition bias)                                       | Unclear risk | For all outcomes missing data reasons reported, ITT analysis, but no info about imputations, small and balanced number of missing patients |
| Selective reporting (reporting bias)                                           | Unclear risk | Differences in the description of weight outcome between a protocol and a manuscript                                                       |
| Other bias                                                                     | Low risk     | None identified                                                                                                                            |
| BMI – body mass index, ITT – intention-to-treat                                |              |                                                                                                                                            |

### Petasne 2013

|                     |                                                                                                                                                                                                                                                                                                                                                                                                                                                                                                                                                                                                                                                                                                                                                                                                                                                                                                   |
|---------------------|---------------------------------------------------------------------------------------------------------------------------------------------------------------------------------------------------------------------------------------------------------------------------------------------------------------------------------------------------------------------------------------------------------------------------------------------------------------------------------------------------------------------------------------------------------------------------------------------------------------------------------------------------------------------------------------------------------------------------------------------------------------------------------------------------------------------------------------------------------------------------------------------------|
| <b>Methods</b>      | <p>RCT, parallel assignment, open label, t tests and regression analysis</p> <p>Country: United States of America</p> <p>Settings: Laparoscopic Institute of South Florida</p> <p>Number of centers: 1</p> <p>COI: No conflict of interest was reported by the authors</p> <p>Funding: Not reported</p> <p>Protocol registration: Not reported</p>                                                                                                                                                                                                                                                                                                                                                                                                                                                                                                                                                |
| <b>Participants</b> | <p>Patients after BS, who completed Phase 1;</p> <p>Inclusion criteria: having undergone a LRYGB 24 2 weeks before recruitment and being Hispanic American with bilingual (Spanish and English) proficiency.</p> <p>Exclusion criteria: physical inability to participate, medical conditions, treatment with antidepressant medication, and/or pregnancy</p> <p>Number of participants screened: 307</p> <p>Number of participants who met inc&amp;exc criteria: 292</p> <p>Number of patients randomized: <u>Intervention:</u> 72, <u>Control:</u> 72</p> <p>Number of patients who underwent bariatric surgery: <u>Intervention:</u> 72, <u>Control:</u> 72</p> <p>Type of bariatric surgery: LRYGB (100%)</p> <p>Number of patients analysed at baseline: <u>Intervention:</u> 72, <u>Control:</u> 72</p> <p>Age mean (SD): <u>Intervention:</u> 44.2 (12.6), <u>Control:</u> 44.8 (14.4)</p> |

|                                                                                                                                                                     |                                                                                                                                                                                                                                                                                                                                                                                               |
|---------------------------------------------------------------------------------------------------------------------------------------------------------------------|-----------------------------------------------------------------------------------------------------------------------------------------------------------------------------------------------------------------------------------------------------------------------------------------------------------------------------------------------------------------------------------------------|
|                                                                                                                                                                     | Female N (%): <u>Intervention</u> : 62 (86.1%), <u>Control</u> : 58 (80.6%)<br><br>Comorbidities N (%):<br><br>Smoking: <u>Intervention</u> : 10 (13.9%), <u>Control</u> : 14 (19.4%)                                                                                                                                                                                                         |
| <b>Interventions</b>                                                                                                                                                | <b>Intervention:</b> Comprehensive nutrition and lifestyle educational intervention: 6 nutrition and lifestyle education and behavioural-motivational sessions in groups of up to 12 participants in Spanish or English according to the participant's language preference.<br><br><b>Control:</b> Brief printed guidelines for healthy eating and physical activity at the first assessment. |
| <b>Outcomes</b>                                                                                                                                                     | Change in depression scores, EBW loss, attendance at the comprehensive educative sessions; visits to psychologists                                                                                                                                                                                                                                                                            |
| COI - Conflict of interest; EBW - excessive body weight; LRYGB - Laparoscopic Roux-en-Y gastric bypass; RCT – randomized controlled trials, SD - Standard deviation |                                                                                                                                                                                                                                                                                                                                                                                               |

*Risk of bias table*

| Bias                                                                                | Authors' judgement | Support for judgement                                                                                                                      |
|-------------------------------------------------------------------------------------|--------------------|--------------------------------------------------------------------------------------------------------------------------------------------|
| Random sequence generation (selection bias)                                         | Unclear risk       | Not reported                                                                                                                               |
| Allocation concealment (selection bias)                                             | Unclear risk       | No details reported                                                                                                                        |
| Blinding of participants and personnel (performance bias)<br>Weight loss/BMI        | Unclear risk       | Objective outcome, open study, outcome could be influenced                                                                                 |
| Blinding of participants and personnel (performance bias)<br>Psychological outcomes | High risk          | Open study, outcome could be influenced                                                                                                    |
| Blinding of outcome assessment (detection bias)<br>Weight loss/BMI                  | Unclear risk       | Objective outcome, open study, outcome could be influenced                                                                                 |
| Blinding of outcome assessment (detection bias)<br>Psychological outcomes           | High risk          | Open study, outcome could be influenced                                                                                                    |
| Incomplete outcome data (attrition bias)                                            | Unclear risk       | For all outcomes missing data reasons reported, ITT analysis, but no info about imputations, small and balanced number of missing patients |
| Selective reporting (reporting bias)                                                | Unclear risk       | The study protocol is not available                                                                                                        |
| Other bias                                                                          | Low risk           | None identified                                                                                                                            |

BMI – body mass index, ITT – intention-to-treat

### Tucker 1991

|                                                                                                                          |                                                                                                                                                                                                                                                                                                                                                                                                                                                                                                                                                                                                                                                                                                               |
|--------------------------------------------------------------------------------------------------------------------------|---------------------------------------------------------------------------------------------------------------------------------------------------------------------------------------------------------------------------------------------------------------------------------------------------------------------------------------------------------------------------------------------------------------------------------------------------------------------------------------------------------------------------------------------------------------------------------------------------------------------------------------------------------------------------------------------------------------|
| <b>Methods</b>                                                                                                           | RCT, parallel assignment, open label, ANOVA, ANCOVA, t test<br><br>Country: United States of America<br><br>Settings: Not reported<br><br>Number of centers: Not reported<br><br>COI: Not reported<br><br>Funding: Not reported<br><br>Protocol registration: Not reported                                                                                                                                                                                                                                                                                                                                                                                                                                    |
| <b>Participants</b>                                                                                                      | Inclusion criteria: The positive psychological benefits of behaviour therapy<br><br>Number of participants screened: 60<br><br>Number of participants who met inc&exc criteria: 50<br><br>Number of patients randomized: <u>Both groups altogether:</u> 41<br><br>Number of patients who underwent bariatric surgery: <u>Intervention:</u> 17, <u>Control:</u> 15<br><br>Type of bariatric surgery: <u>Both groups altogether:</u> GB - 10, VBG - 22<br><br>Number of patients analysed at baseline: <u>Intervention:</u> 17, <u>Control:</u> 15<br><br>Age mean: <u>Both groups altogether:</u> 40.18<br><br>Female N (%): <u>Both groups altogether:</u> 21 (65.6)<br><br>Comorbidities N (%): Not reported |
| <b>Interventions</b>                                                                                                     | The 12 sets of written materials mailed every 2 weeks to treatment subjects (behavioural approach to weight management; nutritional considerations, modification of eating topography, behavioural problem-solving strategies)                                                                                                                                                                                                                                                                                                                                                                                                                                                                                |
| <b>Outcomes</b>                                                                                                          | Weight and blood pressure which were measured at each visit.                                                                                                                                                                                                                                                                                                                                                                                                                                                                                                                                                                                                                                                  |
| COI - Conflict of interest; GB - Gastric Bypass; RCT – randomized controlled trials; VGB - Vertical banded gastroplasty; |                                                                                                                                                                                                                                                                                                                                                                                                                                                                                                                                                                                                                                                                                                               |

**Risk of bias table**

| Bias                                                                         | Authors' judgement | Support for judgement                                                                                                                                              |
|------------------------------------------------------------------------------|--------------------|--------------------------------------------------------------------------------------------------------------------------------------------------------------------|
| Random sequence generation (selection bias)                                  | Unclear risk       | Not reported                                                                                                                                                       |
| Allocation concealment (selection bias)                                      | Unclear risk       | No details reported                                                                                                                                                |
| Blinding of participants and personnel (performance bias)<br>Weight loss/BMI | Unclear risk       | Objective outcome, open study, outcome could be influenced                                                                                                         |
| Blinding of outcome assessment (detection bias)<br>Weight loss/BMI           | Unclear risk       | Objective outcome, open study, outcome could be influenced                                                                                                         |
| Incomplete outcome data (attrition bias)                                     | High risk          | Per-protocol analysis, outcome data and analysis not clearly described, it seems that 60 pts were randomised and only half of them were included into the analysis |
| Selective reporting (reporting bias)                                         | Unclear risk       | The study protocol is not available                                                                                                                                |
| Other bias                                                                   | Low risk           | None identified                                                                                                                                                    |
| BMI – body mass index                                                        |                    |                                                                                                                                                                    |

**Wild 2017**

|                     |                                                                                                                                                                                                                                                                                                                                                                                                                                                                                                                                                                                                                                                                                                       |
|---------------------|-------------------------------------------------------------------------------------------------------------------------------------------------------------------------------------------------------------------------------------------------------------------------------------------------------------------------------------------------------------------------------------------------------------------------------------------------------------------------------------------------------------------------------------------------------------------------------------------------------------------------------------------------------------------------------------------------------|
| <b>Methods</b>      | <p>Randomized controlled two-armed multi-centre trial, Pearson's correlation coefficients, sensitivity analysis</p> <p>Country: Germany</p> <p>Settings: University Hospital of Heidelberg, University Hospital of Tübingen, and the Hospital Sachsenhausen, Frankfurt</p> <p>Number of centers: 3</p> <p>COI: All authors declare no conflict of interest</p> <p>Funding: Funded by the Federal Ministry of Education and Research (No. 01G10843) The funding organization had no influence on the conduct of the study, data analysis, and preparation of the manuscript</p> <p>Protocol registration: <a href="http://www.controlled-trials.com">www.controlled-trials.com</a>: ISRCTN11076390</p> |
| <b>Participants</b> | <p>BMI <math>\geq 40\text{kg/m}^2</math> respectively BMI <math>\geq 35\text{ kg/m}^2</math> with co-morbidities</p> <p>Number of participants screened: 306</p> <p>Number of participants who met inc&amp;exc criteria: 117</p>                                                                                                                                                                                                                                                                                                                                                                                                                                                                      |

|                                                                                                                                                                                                                                                            |                                                                                                                                                                                                                                                                                                                                                                                                                                                                                                                                                                                                                                                                                                                              |
|------------------------------------------------------------------------------------------------------------------------------------------------------------------------------------------------------------------------------------------------------------|------------------------------------------------------------------------------------------------------------------------------------------------------------------------------------------------------------------------------------------------------------------------------------------------------------------------------------------------------------------------------------------------------------------------------------------------------------------------------------------------------------------------------------------------------------------------------------------------------------------------------------------------------------------------------------------------------------------------------|
|                                                                                                                                                                                                                                                            | <p>Number of patients randomized: <u>Intervention:</u> 59, <u>Control:</u> 58</p> <p>Number of patients who underwent bariatric surgery: <u>Intervention:</u> 57, <u>Control:</u> 54</p> <p>Type of bariatric surgery: <u>Intervention:</u> LSG – 33, RYGB – 22, LAGB – 2, missing – 1, <u>Control:</u> LSG - 33, RYGB – 20, LAGB – 1, missing - 2</p> <p>Number of patients analysed at baseline: <u>Intervention:</u> 58, <u>Control:</u> 56</p> <p>Age mean (SD): <u>Intervention:</u> 41.2 (9.0), <u>Control:</u> 41.9 (9.6)</p> <p>Female N (%): <u>Intervention:</u> 35 (60.3%), <u>Control:</u> 45 (80.4%)</p> <p>Comorbidities N (%):</p> <p>Depression: <u>Intervention:</u> 29 (50%), <u>Control:</u> 20 (38%)</p> |
| <b>Interventions</b>                                                                                                                                                                                                                                       | <p><b>Intervention:</b> Same as in control group + Videoconferencing-based psychoeducational group intervention: one year group program that included face-to-face and videoconferencing sessions –</p> <p><b>Control:</b> Conventional surgical visits as implemented in the ongoing clinical routine</p>                                                                                                                                                                                                                                                                                                                                                                                                                   |
| <b>Outcomes</b>                                                                                                                                                                                                                                            | Weight, BMI, %EWL, %TWL, quality of life, depression severity, self-efficacy, eating disorder assessment                                                                                                                                                                                                                                                                                                                                                                                                                                                                                                                                                                                                                     |
| <p>BMI - body mass index; COI, conflict of interest; EWL – excess weight loss; LAGB - Laparoscopic adjustable gastric banding; LSG - Laparoscopic sleeve gastrectomy; RYGB - Roux-en-Y gastric bypass; SD, Standard deviation; TWL - total weight loss</p> |                                                                                                                                                                                                                                                                                                                                                                                                                                                                                                                                                                                                                                                                                                                              |

***Risk of bias table***

| Bias                                                                                     | Authors' judgement | Support for judgement                                         |
|------------------------------------------------------------------------------------------|--------------------|---------------------------------------------------------------|
| Random sequence generation (selection bias)                                              | Low risk           | By randomization software “RANDI 2”                           |
| Allocation concealment (selection bias)                                                  | Low risk           | Randomization program was applied by an independent assistant |
| Blinding of participants and personnel (performance bias)<br>Weight loss/BMI             | Unclear risk       | Objective outcome, open study, outcome could be influenced    |
| Blinding of participants and personnel (performance bias)<br>Quality of life             | High risk          | Open study, outcome could be influenced                       |
| Blinding of participants and personnel (performance bias)<br>Psychological outcomes      | High risk          | Open study, outcome could be influenced                       |
| Blinding of participants and personnel (performance bias)<br>Self efficacy               | High risk          | Open study, outcome could be influenced                       |
| Blinding of participants and personnel (performance bias)<br>Nonnormative eating pattern | High risk          | Open study, outcome could be influenced                       |

|                                                                                |              |                                                                            |
|--------------------------------------------------------------------------------|--------------|----------------------------------------------------------------------------|
| Blinding of outcome assessment (detection bias)<br>Weight loss/BMI             | Unclear risk | In majority reported by patients                                           |
| Blinding of outcome assessment (detection bias)<br>Quality of life             | High risk    | Reported by patients                                                       |
| Blinding of outcome assessment (detection bias)<br>Psychological outcomes      | High risk    | Reported by patients                                                       |
| Blinding of outcome assessment (detection bias)<br>Self efficacy               | High risk    | Reported by patients                                                       |
| Blinding of outcome assessment (detection bias)<br>Nonnormative eating pattern | High risk    | Reported by patients                                                       |
| Incomplete outcome data (attrition bias)                                       | Low risk     | ITT and PP analyses were performed and missing data imputed MMRM algorithm |
| Selective reporting (reporting bias)                                           | Low risk     | Outcomes reported as defined in protocol.                                  |
| Other bias                                                                     | Low risk     | None identified                                                            |
| BMI – body mass index                                                          |              |                                                                            |

Supplementary Materials, Table S5: List of excluded studies

| Study ID            | Reason for exclusion |
|---------------------|----------------------|
| Baruch 2008         | Wrong population     |
| Bond 2015           | Wrong outcomes       |
| Bracaglia 2011      | Wrong study design   |
| Brown 2009          | Wrong population     |
| Case 2011           | Wrong population     |
| Cassin 2016         | Wrong outcomes       |
| Centro 2015         | Wrong population     |
| Centro 2017         | Wrong population     |
| Chacko 2016         | Wrong population     |
| Chacko b 2016       | Wrong population     |
| Columbia 2016       | Wrong intervention   |
| Cowan 2001          | Wrong outcomes       |
| Ana 2004            | Wrong population     |
| David 2016          | Wrong outcomes       |
| Delparte 2018       | Wrong study design   |
| Drexel 2005         | Wrong population     |
| Drexel 2008         | Wrong population     |
| Drexel 2011         | Wrong population     |
| Drexel 2012         | Wrong population     |
| Drexel 2016         | Wrong study design   |
| Duke 2007           | Wrong population     |
| Duke 2015           | Wrong population     |
| Duke 2017           | Wrong population     |
| Elakkary 2004       | Wrong study design   |
| Eli 2009            | Wrong population     |
| Federal 2015        | Wrong population     |
| Federal 2016        | Wrong study design   |
| Felix 2018          | Wrong outcomes       |
| Francine 2013       | Wrong population     |
| Garcia-Delgado 2021 | Wrong intervention   |
| Gradaschi 2019      | Wrong study design   |
| Grilo 2021          | Wrong population     |
| Grupo 2012          | Wrong study design   |
| Horber 2021         | Wrong intervention   |
| Hospices 2009       | Wrong population     |
| Hôpital 2015        | Wrong population     |
| Icahn 2013          | Wrong population     |
| Imperial 2011       | Wrong population     |
| Kaiser 2004         | Wrong population     |
| Kansas 2012         | Wrong population     |
| Lent 2019           | Wrong outcomes       |
| Linkoepping 2015    | Wrong population     |
| Marcon 2016         | Wrong outcomes       |

| Study ID                            | Reason for exclusion |
|-------------------------------------|----------------------|
| Marcon 2017                         | Wrong outcomes       |
| Matteo 2007                         | Wrong population     |
| Mayo 2010                           | Wrong study design   |
| Mensorio 2016                       | Wrong study design   |
| National 2002                       | Wrong population     |
| New Study                           | Wrong study design   |
| New Studyb                          | Wrong study design   |
| Norwegian 2009                      | Wrong study design   |
| Novindiet 2015                      | Wrong population     |
| Ochner 2007                         | Wrong study design   |
| Oklahoma 2016                       | Wrong population     |
| Papalazarou 2010                    | Wrong intervention   |
| Parikh 2012                         | Wrong intervention   |
| Qatar 2013                          | Wrong population     |
| Quilez-Orden 2021                   | Wrong study design   |
| Research 2008                       | Wrong population     |
| Rush University Medical Center 2019 | Wrong outcomes       |
| Saunders 2004                       | Wrong study design   |
| Schweiger 2015                      | Wrong study design   |
| Sellberg 2018                       | Wrong population     |
| Sellberg 2019                       | Wrong population     |
| Sockalingam 2017                    | Wrong study design   |
| Sockalingam 2019                    | Wrong study design   |
| Stahre 2008                         | Wrong population     |
| Stanford 2006                       | Wrong population     |
| Süd 2012                            | Wrong population     |
| The 2015                            | Wrong population     |
| University 2011                     | Wrong population     |
| University 2011a                    | Wrong population     |
| University 2012                     | Wrong study design   |
| University 2014                     | Wrong study design   |
| Washington 1994                     | Wrong population     |
| Washington 1997                     | Wrong population     |
| Weineland 2011                      | Wrong outcomes       |
| Weineland 2012                      | Wrong population     |
| Weineland 2012a                     | Wrong population     |
| Yale 2002                           | Wrong population     |
| Yale 2007                           | Wrong population     |
| Yale 2008                           | Wrong population     |
| Yale 2017                           | Wrong population     |
| Yale 2017a                          | Wrong population     |
| Yale 2017b                          | Wrong population     |
|                                     |                      |

## **Excluded studies**

### **Baruch 2008**

Baruch College City University of New York, National Institute of Diabetes, Digestive, Kidney Diseases. Managing Obesity by Combining Behavioral Weight Loss and Commercial Approaches. 2008.

### **Bond 2015**

Bond Ds, Vithiananthan S, Thomas Jg, Trautvetter J, UnickJl, Jakicic Jm, et al. Bari-Active: a randomized controlled trial of a preoperative intervention to increase physical activity in bariatric surgery patients. 2015;11(1):169-77.

### **Bracaglia 2011**

Bracaglia R, D'Ettorre M, Gniuli D, Gigliofiorito P, Gentileschi S, Mingrone G. Morbidly obese patients undergoing bariatric and body contouring surgery: Psychological evaluation after treatments. Journal of Plastic, Reconstructive and Aesthetic Surgery 2011;64(9):1246-8.

### **Brown 2009**

Brown University, National Institute of Mental Health. Integrated Treatment for Comorbid Depression and Obesity in Adolescents. 2009.

### **Case 2011**

Case Western Reserve University, National Heart Lung, Blood Institute. Ideas Moving Parents and Adolescents to Change Together (IMPACT). 2011.

### **Cassin 2016**

Cassin Se, Sockalingam S, Du C, Wnuk S, Hawa R, Parikh Sv. A pilot randomized controlled trial of telephone-based cognitive behavioural therapy for preoperative bariatric surgery patients. 2016;80:17-22.

### **Centro 2015**

Centro Hospitalar Lisboa Norte, Faculdade de Medicina de Lisboa, Faculdade de Psicologia e de Ciências de Educação da Universidade do Porto. Efficacy of Motivational Interview in the Treatment of Obesity and Overweight in Adolescents. 2015.

### **Centro 2017**

Centro Mente Aberta de Mindfulness, Conselho Nacional de Desenvolvimento Científico e Tecnológico. Mindfulness Intervention for Overweight Primary Care Patients. 2017.

### **Chacko 2016**

Beth Israel Deaconess Medical Center, Center for Nutritional Research Charitable Trust. A Trial of Lifestyle Interventions to Control Weight After Bariatric Surgery. <https://ClinicalTrials.gov/show/NCT02603601> 2014.

### **Chacko b 2016**

Chacko SA, Yeh GY, Davis RB, Wee CC. A mindfulness-based intervention to control weight after bariatric surgery: Preliminary results from a randomized controlled pilot trial. Complementary therapies in medicine 2016;28:13-21.

### **Columbia 2016**

Columbia University, National Institute of Diabetes, Digestive, Kidney Diseases. Mechanisms Underlying Predictors of Success From Obesity Surgery. 2016.

### **Cowan 2001**

Cowan Gs, Buffington Ck, Cowan Gs, Hathaway D. Assessment of the effects of a taped cognitive behavior message on postoperative complications (therapeutic suggestions under anesthesia). 2001;11(5):589-93.

### **Damaso 2004**

Damaso AR, da Silveira Campos RM, Castro SE, Pelissari Kravchychyn AC. The Effect of 1 Year of Multiprofessional Therapy on Obesity. 2004.

### **David 2016**

David LA, Sockalingam S, Wnuk S, Cassin SE. A pilot randomized controlled trial examining the feasibility, acceptability, and efficacy of Adapted Motivational Interviewing for post-operative bariatric surgery patients. Eating behaviors 2016;22:87-92.

### **Delparte 2018**

Delparte CA, Power HA, Gelinas BL, Oliver AM, Hart RD, Wright KD. Examination of the effectiveness of a brief, adapted dialectical behavior therapy- skills training group for bariatric surgical candidates. Obesity Surgery 2019;29(1):252-61.

**Drexel 2005**

Drexel University, National Institute of Diabetes, Digestive, Kidney Diseases. Weight Loss Maintenance in Primary Care. 2005.

**Drexel 2008**

Drexel University, National Institute of Diabetes, Digestive, Kidney Diseases. Behavioral Treatment for Weight Loss. 2008.

**Drexel 2011**

Drexel University. Environmental and Acceptance-Based Innovations for Weight Loss Maintenance. 2011.

**Drexel 2012**

Drexel University. Acceptance-based Behavioral Treatment for Obesity: Maintenance and Mechanisms. 2012.

**Drexel 2016**

Drexel University. Project BITE: Binge Intervention Target Effectiveness. 2016.

**Duke 2007**

Duke University, University of Pennsylvania, National Center for Complementary, Integrative Health. Engaging Motivation for the Prevention of Weight Regain. 2007.

**Duke 2015**

Duke University, University of North Carolina Chapel Hill. Integrated Child Obesity Treatment Study: Bull City Healthy and Fit. 2015.

**Duke 2017**

Duke University. Charge: A Text Messaging-based Weight Loss Intervention. 2017.

**Elakkary 2004**

Elakkary E, Gazayerli MM. Laparoscopic adjustable gastric band: Do support groups add to the weight loss? OBES. SURG. 2004;14(8):1139-40.

**Eli 2009**

Eli Lilly, Company. A Weight Loss Study in Overweight Men and Women. 2009.

**Federal 2015**

Federal University of São Paulo, University of Western Sydney. Healthy approach to weight management and Food in Eating Disorders (HAPIFED). 2015.

**Federal 2016**

Federal University of São Paulo, Conselho Nacional de Desenvolvimento Científico e Tecnológico, Fundação de Amparo à Pesquisa do Estado de São Paulo, Coordination for the Improvement of Higher Education Personnel. Interdisciplinary Intervention in Patients With Obesity and Other Metabolic Diseases. 2016.

**Felix 2018**

Felix M, Ferreira MBG, Oliveira LF, Barichello E, Pires PDS, Barbosa MH. Guided imagery relaxation therapy on preoperative anxiety: a randomized clinical trial. Revistalatio-americana de enfermagem. 2018;26:e3101.

**Francine 2013**

Francine Rosselli, Wesleyan University. Binge Eating Self-help Treatment for University Students. <https://ClinicalTrials.gov/show/NCT01888406> 2013.

**Garcia-Delgado 2021**

Garcia-Delgado, Y., Lopez-Madrado-hernandez, M., Alvarado-Martel, D., Miranda-Calderin, G., Ugarte-Lopetegui, A., Gonzalez-Medina, R., . . . et al. (2021). Prehabilitation for bariatric surgery: a randomized, controlled trial protocol and pilot study. 13(9).

**Gradaschi 2019**

Gradaschi R, Molinari V, Sukkar SG, De Negri P, Adami GF, Camerini G. Effects of the Postoperative Dietetic/Behavioral Counseling on the Weight Loss After Bariatric Surgery. Obesity surgery. 2019.

**Grilo 2021**

Grilo, C., Ivezaj, V., Duffy, A., & Gueorguieva, R. (2021). Randomized Controlled Trial of Treatments for Loss-of-Control Eating Following Bariatric Surgery. 29(4), 689-697.

**Grupo 2012**

GrupoLusófona, Fundação para a Ciência e a Tecnologia, University of Lisbon. Treatment of Pediatric Obesity (TOP) - A Multidisciplinary Approach Involving Adolescents and Their Peers. <https://ClinicalTrials.gov/show/NCT02024061> 2012.

**Hôpital 2015**

Hôpital le Vinatier. Early and Short Psycho-educational Lifestyle Intervention. <https://ClinicalTrials.gov/show/NCT02657941> 2015.

**Horber 2021**

Horber, F. F., & Steffen, R. (2021). Reversal of Long-Term Weight Regain After Roux-en-Y Gastric Bypass Using Liraglutide or Surgical Revision. A Prospective Study. Obesity surgery, 31(1), 93-100.

**Hospices 2009**

Hospices Civils de Lyon. Sleep and Obesity in Teenagers. <https://ClinicalTrials.gov/show/NCT00841347> 2009.

**Icahn 2013**

Icahn School of Medicine at Mount Sinai, NoomInc, Kaiser Foundation Hospitals Center for Health Research, National Institute of Mental Health. Smartphone Technology and CBT-GSH in Binge Eaters. <https://ClinicalTrials.gov/show/NCT02399982> 2013.

**Imperial 2011**

Imperial College London, National Institute for Health Research United Kingdom. Bariatric Surgery and Guided Self-help for Binge Eating Disorder. <https://ClinicalTrials.gov/show/NCT02094027> 2011.

**Kaiser 2004**

Kaiser Permanente, National Institute of Mental Health. Guided Self-Help Treatment for Binge Eating Disorder. <https://ClinicalTrials.gov/show/NCT00158340> 2004.

**Kansas 2012**

Kansas State University. The Wildcat Wellness Coaching Trial. <https://ClinicalTrials.gov/show/NCT01845480> 2012.

**Lent 2019**

Lent MR, Campbell LK, Kelly MC, Lawson JL, Murakami JM, Gorrell S, et al. The feasibility of a behavioral group intervention after weight-loss surgery: A randomized pilot trial. PLoS ONE 2019;14(10).

**Linkoeping 2015**

Linkoeping University. Individually Tailored Web-based Cbt for Eating Disorders and the Role of Knowledge Acquisition. <https://ClinicalTrials.gov/show/NCT02700620> 2015.

**Marcon 2016**

Marcon Er, Baglioni S, Bittencourt L, Lopes Cln, Neumann Cr, TrindadeMrm. What Is the Best Treatment before Bariatric Surgery? Exercise, Exercise and Group Therapy, or Conventional Waiting: a Randomized Controlled Trial. 2016;1-11.

**Marcon 2017**

MarconEr, Baglioni S, Bittencourt L, Lopes Cln, Neumann Cr, TrindadeMrm. What Is the Best Treatment before Bariatric Surgery? Exercise, Exercise and Group Therapy, or Conventional Waiting: a Randomized Controlled Trial. 2017;27(3):763-73.

**Matteo 2007**

Matteo IrccsPoliclinico S. Effectiveness of Cognitive Behavioral Therapy vs. Prescriptive Diet in Short and Medium-term Control of Body Weight. <https://ClinicalTrials.gov/show/NCT01686854> 2007.

**Mayo 2010**

Mayo Clinic. A Psychological and Behavioral Intervention for Post-Bariatric Patients. <https://ClinicalTrials.gov/show/NCT01453517> 2010.

**Mensorio 2016**

Mensorio M, Costa-Júnior Á. Psychological intervention to candidates for surgery bariatric in a public hospital in Brazil. Revista Peruana de Medicina Experimental y SaludPublica 2016;33(1):120-7.

**National 2002**

National Institute of Diabetes, Digestive, Kidney Diseases, Hoffmann-La Roche. Effectiveness of Brief Counseling for Weight Management. <https://ClinicalTrials.gov/show/NCT00212199> 2002.

**New Study**

Identifying, evaluating, and treating overweight and obesity in adults. Revista Panamericana de Salud Publica/Pan American Journal of Public Health 2001;10(2):118-24.

**New Studyb**

64th Scientific Sessions of the American Diabetes Association. Practical Diabetes International 2004;21(8):314-316a.

**Norwegian 2009**

Norwegian School of Sport Sciences, Hjelp. Lifestyle intervention for the Treatment of Severe Obesity. <https://ClinicalTrials.gov/show/NCT01675713> 2009.

**Novindiet 2015**

Novindiet Clinic, Tehran University of Medical Sciences, University of Nottingham. Effects of Cognitive Behavioral Therapy (CBT) on Weight Maintenance After Successful Weight Loss. <https://ClinicalTrials.gov/show/NCT02398253> 2015.

**Ochner 2007**

Ochner C N, Geliebter A. Binge eating disorder. Management 2007;3(4):161-4.

**Oklahoma 2016**

Oklahoma State University, Kent State University, Case Western Reserve University, University of Minnesota Clinical, Translational Science Institute, Drexel University, et al. Cognitive and Self-regulatory Mechanisms Of Obesity Study. <https://ClinicalTrials.gov/show/NCT02786238> 2016.

**Papalazarou 2010**

Papalazarou A, Yannakoulia M, Kavouras SA, Komesidou V, Dimitriadis G, Papakonstantinou A, et al.. Lifestyle Intervention Favorably Affects Weight Loss and Maintenance Following Obesity Surgery. Obesity (Silver Spring) 2010;18(7):1348-53..

**Parikh 2012**

Parikh M, Dasari M, McMacken M, Ren C, Fielding G, Ogedegbe G. Does a preoperative medically supervised weight loss program improve bariatric surgery outcomes? A pilot randomized study. 2012;26(3):853-61.

**Qatar 2013**

Qatar University, Imperial College London, Hamad Medical Corporation, Supreme Council Of Health Qatar, Aspetar, Leeds Beckett University. Adapted Cognitive Behavioral Approach to Addressing Overweight and Obesity Among Qatari Youth. <https://ClinicalTrials.gov/show/NCT02972164> 2013.

**Quilez-Orden 2021**

Quilez-Orden, A., Ferreres-Galan, V., & Osma, J. (2020). Feasibility and Clinical Usefulness of the Unified Protocol in Online Group Format for Bariatric Surgery Candidates: Study Protocol for a Multiple Baseline Experimental Design. International journal of environmental research and public health, 17(17).

**Research 2008**

Research V A Office of, Development. Cognitive Behavioral Therapy for Obesity. <https://ClinicalTrials.gov/show/NCT00569517> 2008.

**Rush University Medical Center 2019**

Rush University Medical Center. Post-Bariatric Weight Regain Behavioral Intervention. <https://ClinicalTrials.gov/show/NCT03564392>.

**Saunders 2004**

Saunders R. Post-surgery group therapy for gastric bypass patients. Obesity surgery 2004;14(8):1128-31.

**Schweiger 2015**

Schweiger U. Counseling intervention helps little in obesity. MMW Fortschritte der Medizin 2015;157(9):39.

**Sellberg 2018**

SellbergF, Possmark S, Ghaderi A, Näslund E, Willmer M, Tynelius P, et al. A dissonance-based intervention for women post roux-en-Y gastric bypass surgery aiming at improving quality of life and physical activity 24 months after surgery: study protocol for a randomized controlled trial. BMC Surgery 2018; 18(1):25.

**Sellberg 2019**

Sellberg F, Possmark S, Willmer M, Tynelius P, Berglind D. One-year follow-up of a dissonance-based intervention on quality of life, wellbeing, and physical activity after Roux-en-Y gastric bypass surgery: a randomized controlled trial. *Surgery for Obesity and Related Diseases*. 2019

**Sockalingam 2017**

Sockalingam S, Cassin S E, Wnuk S, Du C, Jackson T, Hawa R, et al. A Pilot Study on Telephone Cognitive Behavioral Therapy for Patients Six-Months Post-Bariatric Surgery. *Obesity Surgery* 2017;27(3):670-5.

**Sockalingam 2019**

Sockalingam S, Cassin S E, Wnuk S, Du C, Jackson T, Hawa R, et al. A Pilot Study on Telephone Cognitive Behavioral Therapy for Patients Six-Months Post-Bariatric Surgery. *Obesity Research and Clinical Practice* 2019;13(5): 499-504.

**Stahre 2008**

Stahre L. *Lakartidningen* 2008;105(38):2572-4.

**Stanford 2006**

Stanford University, American Heart Association. Behavioral Strategies for Weight Management. <https://ClinicalTrials.gov/show/NCT00575731> 2006.

**Süd 2012**

Süd F E M. Web Based Follow up Intervention in Obesity Treatment for Women. <https://ClinicalTrials.gov/show/NCT01675687> 2012.

**The 2015**

The Miriam Hospital, National Institute of Diabetes, Digestive, Kidney Diseases. Using Novel Behavioral Approaches to Improve Long-Term Weight Loss Outcomes. <https://ClinicalTrials.gov/show/NCT02156752> 2015.

**University 2011**

University of North Carolina Chapel Hill, National Institute of Diabetes, Digestive, Kidney Diseases. Family PALS (Partners in Lifestyle Support). <https://ClinicalTrials.gov/show/NCT01324011> 2011.

**University 2011a**

University of Wuerzburg. Severe Obesity: Bariatric Surgery vs. Life-Style-Intervention. <https://ClinicalTrials.gov/show/NCT01352403> 2011.

**University 2012**

University Health Network Toronto. Telephone-based Cognitive Behavioral Therapy for Bariatric Surgery Patients: A Pilot Study. <https://ClinicalTrials.gov/show/NCT01508585> 2012.

**University 2014**

University Health Network Toronto. Tele-CBT One Year Following Bariatric Surgery: A Pilot Study. <https://ClinicalTrials.gov/show/NCT02920112> 2014.

**Washington 1994**

Washington University School of Medicine. Psychological Treatment of Overweight Binge Eaters. <https://ClinicalTrials.gov/show/NCT01208272> 1994.

**Washington 1997**

Washington University School of Medicine. The Psychological Treatment of Overweight Binge Eaters Minority Supplement. <https://ClinicalTrials.gov/show/NCT01208259> 1997.

**Weineland 2011**

Weineland Sm, Arvidsson D, Kakoulidis T, Dahl J. Acceptance and commitment therapy for bariatric surgery patients, a pilot rct. 2011;21(8):1044.

**Weineland 2012**

Weineland S, Hayes S C, Dahl J. Psychological flexibility and the gains of acceptance-based treatment for post-bariatric surgery: Six-month follow-up and a test of the underlying model. *Clinical* 2012;2(1-2):15-24.

**Weineland 2012a**

Weineland S, Arvidsson D, KakoulidisTp, Dahl J. Acceptance and commitment therapy for bariatric surgery patients, a pilot RCT. *Obesity Research & Clinical Practice* 2012;6(1):e21-30.

**Yale 2002**

Yale University, National Institute of Diabetes, Digestive, Kidney Diseases. Treatment for Obesity and Binge Eating Disorder. <https://ClinicalTrials.gov/show/NCT00537758> 2002.

**Yale 2007**

Yale University, National Institutes of Health, National Institute of Diabetes, Digestive, Kidney Diseases. Treatment of Binge Eating in Obese Patients in Primary Care. <https://ClinicalTrials.gov/show/NCT00537810> 2007.

**Yale 2008**

Yale University, National Institute of Diabetes, Digestive, Kidney Diseases. Treatment of Obesity and Binge Eating: Behavioral Weight Loss Versus Stepped Care. <https://ClinicalTrials.gov/show/NCT00829283> 2008.

**Yale 2017**

Yale University, National Institute of Diabetes, Digestive, Kidney Diseases. Behavioral and Pharmacologic Treatment of Binge Eating and Obesity: Specialist Treatment. <https://ClinicalTrials.gov/show/NCT03063606> 2017.

**Yale 2017a**

Yale University, National Institute of Diabetes, Digestive, Kidney Diseases. Behavioral and Pharmacologic Treatment of Binge Eating and Obesity: Acute Treatment. <https://ClinicalTrials.gov/show/NCT03045341> 2017.

**Yale 2017b**

Yale University, National Institute of Diabetes, Digestive, Kidney Diseases. Behavioral and Pharmacologic Treatment of Binge Eating and Obesity: Maintenance Therapy. <https://ClinicalTrials.gov/show/NCT03047005> 2017.

Supplementary Materials, Figure S1: Graphical presentation of review authors' judgements about each risk of bias item for each included study.

|                 | Random sequence generation (selection bias) | Allocation concealment (selection bias) | Blinding of participants and personnel (performance bias): Weight loss/BMI | Blinding of participants and personnel (performance bias): Quality of life | Blinding of participants and personnel (performance bias): Psychological outcomes | Blinding of participants and personnel (performance bias): Nonnormative eating pattern | Blinding of outcome assessment (detection bias): Weight loss/BMI | Blinding of outcome assessment (detection bias): Quality of life | Blinding of outcome assessment (detection bias): Psychological outcomes | Blinding of outcome assessment (detection bias): Nonnormative eating pattern | Incomplete outcome data (attrition bias) | Selective reporting (reporting bias) | Other bias |
|-----------------|---------------------------------------------|-----------------------------------------|----------------------------------------------------------------------------|----------------------------------------------------------------------------|-----------------------------------------------------------------------------------|----------------------------------------------------------------------------------------|------------------------------------------------------------------|------------------------------------------------------------------|-------------------------------------------------------------------------|------------------------------------------------------------------------------|------------------------------------------|--------------------------------------|------------|
| Hjelmæsæth 2018 | +                                           | +                                       | +                                                                          |                                                                            | -                                                                                 | -                                                                                      | +                                                                |                                                                  | -                                                                       | -                                                                            | -                                        | +                                    | +          |
| Hollywood 2015  | ?                                           | +                                       | ?                                                                          | -                                                                          | -                                                                                 | -                                                                                      | ?                                                                | -                                                                | -                                                                       | -                                                                            | -                                        | +                                    | +          |
| Kalarchian 2012 | ?                                           | ?                                       | +                                                                          |                                                                            |                                                                                   |                                                                                        | +                                                                |                                                                  |                                                                         |                                                                              | ?                                        | -                                    | +          |
| Kalarchian 2016 | +                                           | ?                                       | +                                                                          |                                                                            | -                                                                                 | -                                                                                      | +                                                                |                                                                  | -                                                                       | -                                                                            | -                                        | -                                    | +          |
| Lier 2012       | +                                           | +                                       | ?                                                                          |                                                                            | -                                                                                 |                                                                                        | ?                                                                |                                                                  | -                                                                       |                                                                              | -                                        | -                                    | +          |
| Paul 2021       | +                                           | +                                       | ?                                                                          | -                                                                          | -                                                                                 | -                                                                                      | ?                                                                | -                                                                | -                                                                       | -                                                                            | ?                                        | ?                                    | +          |
| Petasne 2013    | ?                                           | ?                                       | ?                                                                          |                                                                            | -                                                                                 |                                                                                        | ?                                                                |                                                                  | -                                                                       |                                                                              | ?                                        | ?                                    | +          |
| Tucker 1991     | ?                                           | ?                                       | ?                                                                          |                                                                            |                                                                                   |                                                                                        | ?                                                                |                                                                  |                                                                         |                                                                              | -                                        | ?                                    | +          |
| Wild 2017       | +                                           | +                                       | ?                                                                          | -                                                                          | -                                                                                 | -                                                                                      | ?                                                                | -                                                                | -                                                                       | -                                                                            | +                                        | +                                    | +          |

**Supplementary Materials, Figure S2:** Review authors' judgements about each risk of bias item presented as percentages across all included studies.

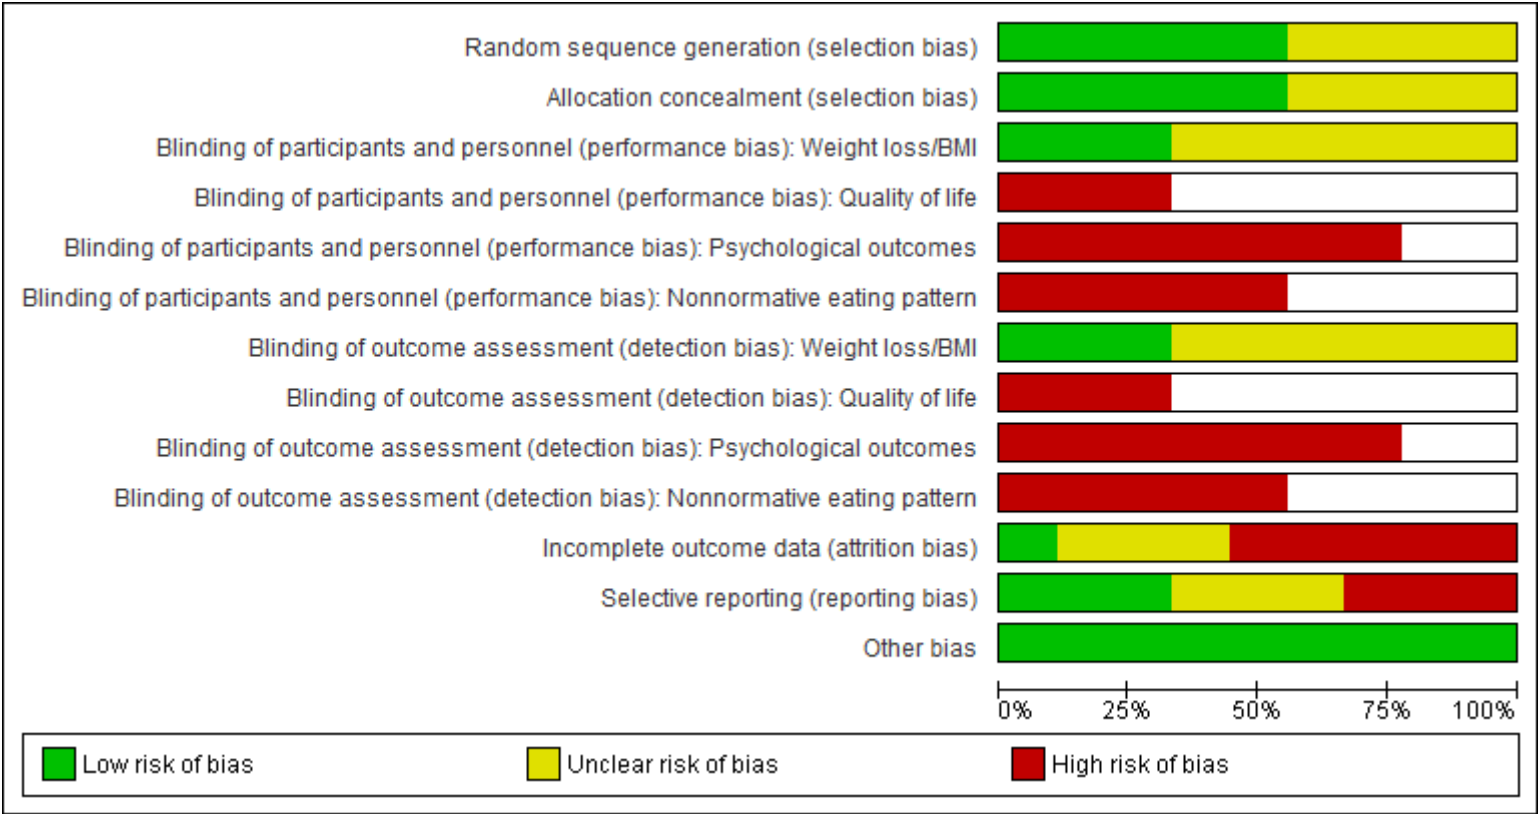

BMI: body mass index

| Posterior Estimates per Model |   |        |       |                       |       |                    |
|-------------------------------|---|--------|-------|-----------------------|-------|--------------------|
|                               |   | Mean   | SD    | 95% Credible Interval |       | BF <sub>01</sub>   |
|                               |   |        |       | Lower                 | Upper |                    |
| Random effects                | μ | -0.287 | 0.643 | -1.689                | 0.909 | 1.540              |
|                               | τ | 0.354  | 0.506 | 0.040                 | 1.737 | 1.129 <sup>a</sup> |

Note.  $\mu$  and  $\tau$  are the group-level effect size and standard deviation, respectively.

<sup>a</sup> Bayes factor of the fixed effects  $H_1$  over the random effects  $H_1$ .

Forest Plot

Observed study effects

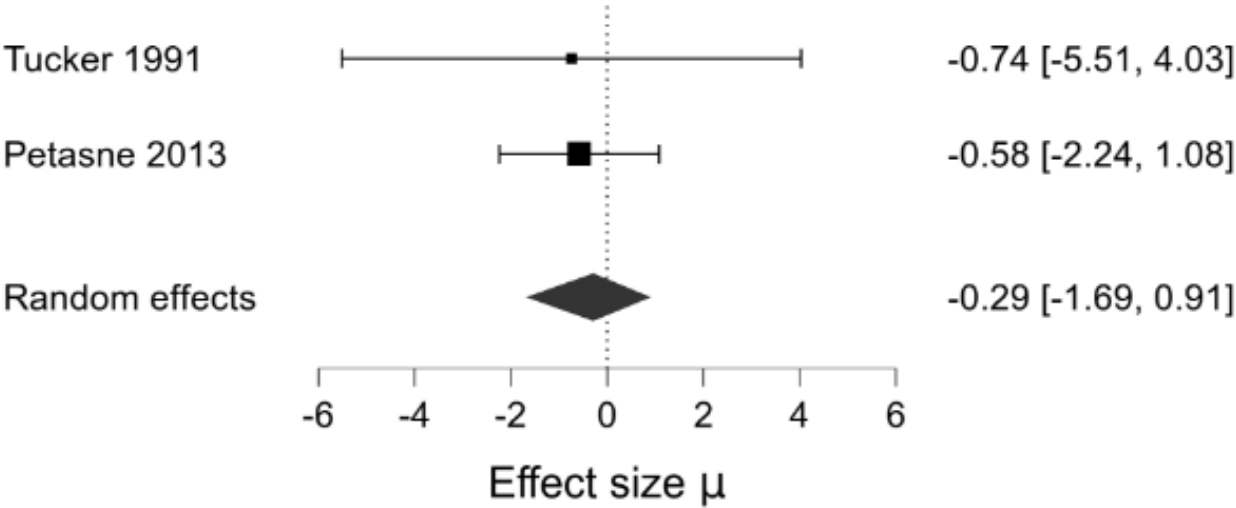

| Posterior Estimates per Model |   |        |       |                       |       |                    |
|-------------------------------|---|--------|-------|-----------------------|-------|--------------------|
|                               |   | Mean   | SD    | 95% Credible Interval |       | BF <sub>01</sub>   |
|                               |   |        |       | Lower                 | Upper |                    |
| Random effects                | μ | -0.588 | 0.371 | -1.338                | 0.120 | 0.590              |
|                               | τ | 0.358  | 0.376 | 0.041                 | 1.366 | 0.988 <sup>a</sup> |

Note.  $\mu$  and  $\tau$  are the group-level effect size and standard deviation, respectively.

<sup>a</sup> Bayes factor of the fixed effects  $H_1$  over the random effects  $H_1$ .

Forest Plot

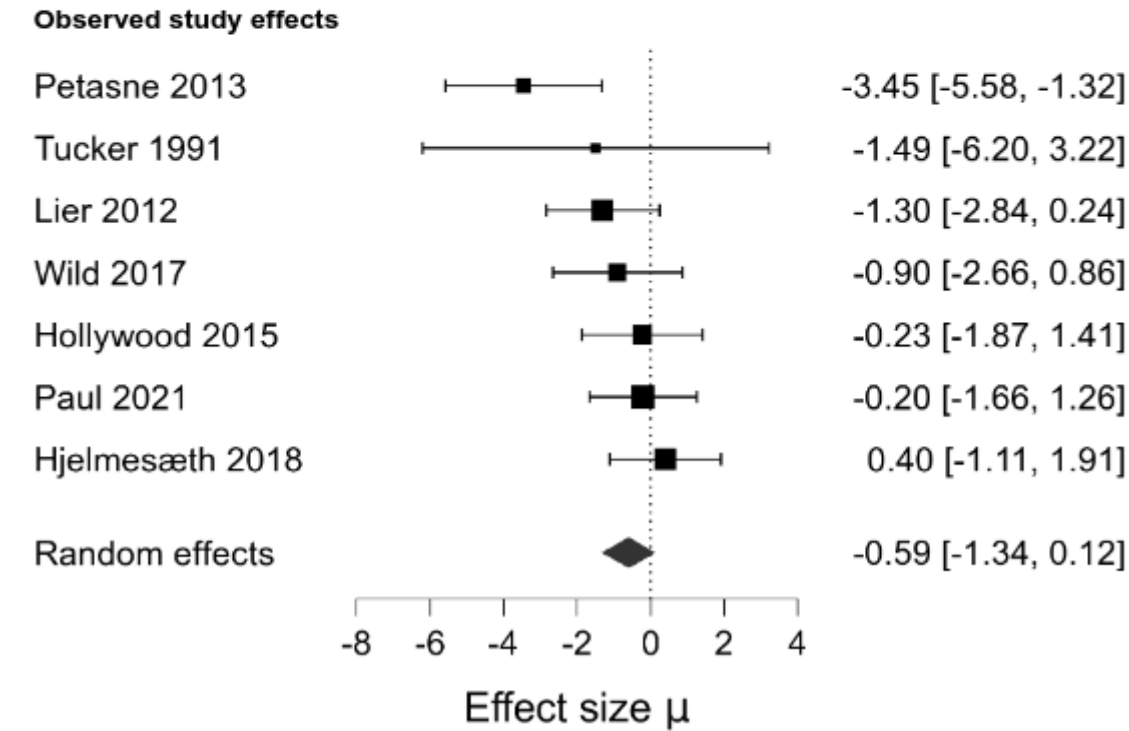

**Supplementary Materials, Table S6:** Results from random-effects meta-analyses

| <b>Outcome</b>                                                 | <b>Number of studies</b> | <b>Number of participants</b> | <b>Mean Difference ( 95% CrI)</b> | <b>Heterogeneity [tau] (95% CrI)</b> |
|----------------------------------------------------------------|--------------------------|-------------------------------|-----------------------------------|--------------------------------------|
| Change in BMI [kg/m <sup>2</sup> ] 6-12 months follow-up       | 2                        | 176                           | -0.29 [-1.6, 0.83]                | 0.35 (0.04 – 1.74)                   |
| Change in BMI [kg/m <sup>2</sup> ] 1-2 years follow-up         | 7                        | 742                           | -0.59 [-1.34, 0.12]               | 0.36 (0.04 – 1.37)                   |
| Last follow-up of change in BMI [kg/m <sup>2</sup> ]           | 7                        | 677                           | -0.58 [-1.32, 0.15]               | 0.35 (0.04 – 1.41)                   |
| WL [kg] 6-12 months of follow-up                               | 4                        | 416                           | 0.14 [-1.43, 1.97]                | 0.35 (0.04 – 1.68)                   |
| WL [kg] 1-2 years follow-up                                    | 8                        | 842                           | -0.56 [-2.20, 0.66]               | 0.41 (0.04 – 2.05)                   |
| Last follow-up of WL [kg]                                      | 9                        | 731                           | -0.50 [-2.21, 0.77]               | 0.64 (0.04 – 3.73)                   |
| WL [%] 6-12 months follow-up                                   | 1                        | 143                           | -1.60 [-4.68, 1.48]               | NA                                   |
| WL [%] 1-2 years follow-up                                     | 2                        | 223                           | -0.54 [-2.79, 1.07]               | 0.41 (0.04 – 2.14)                   |
| Last follow-up WL [%]                                          | 2                        | 204                           | -1.06 [-4.53, 0.92]               | 0.49 (0.04 – 2.79)                   |
| CrI – credible interval, NA - not applicable, WL – weight loss |                          |                               |                                   |                                      |

Supplementary Materials, Figure S5: Comparison between psychological intervention versus any control in the WL at 6-12 months follow-up  
Posterior Estimates per Model

|                |   |       |       | 95% Credible Interval |       | BF <sub>01</sub>   |
|----------------|---|-------|-------|-----------------------|-------|--------------------|
|                |   | Mean  | SD    | Lower                 | Upper |                    |
| Random effects | μ | 0.140 | 0.811 | -1.429                | 1.968 | 1.443              |
|                | τ | 0.351 | 0.490 | 0.039                 | 1.684 | 1.090 <sup>a</sup> |

Note.  $\mu$  and  $\tau$  are the group-level effect size and standard deviation, respectively.

<sup>a</sup> Bayes factor of the fixed effects  $H_1$  over the random effects  $H_1$ .

Forest Plot ▼

Observed study effects

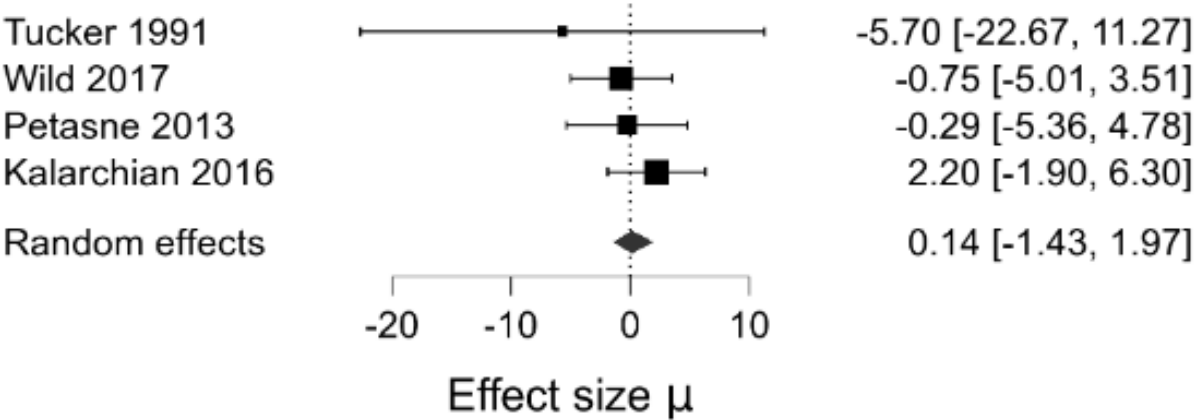

Posterior Estimates per Model

|                |        | 95% Credible Interval |       |        |       | BF <sub>01</sub>   |
|----------------|--------|-----------------------|-------|--------|-------|--------------------|
|                |        | Mean                  | SD    | Lower  | Upper |                    |
| Random effects | $\mu$  | -0.558                | 0.715 | -2.195 | 0.656 | 1.180              |
|                | $\tau$ | 0.412                 | 0.572 | 0.039  | 2.052 | 1.046 <sup>a</sup> |

Note.  $\mu$  and  $\tau$  are the group-level effect size and standard deviation, respectively.

<sup>a</sup> Bayes factor of the fixed effects  $H_1$  over the random effects  $H_1$ .

Forest Plot ▼

Observed study effects ▼

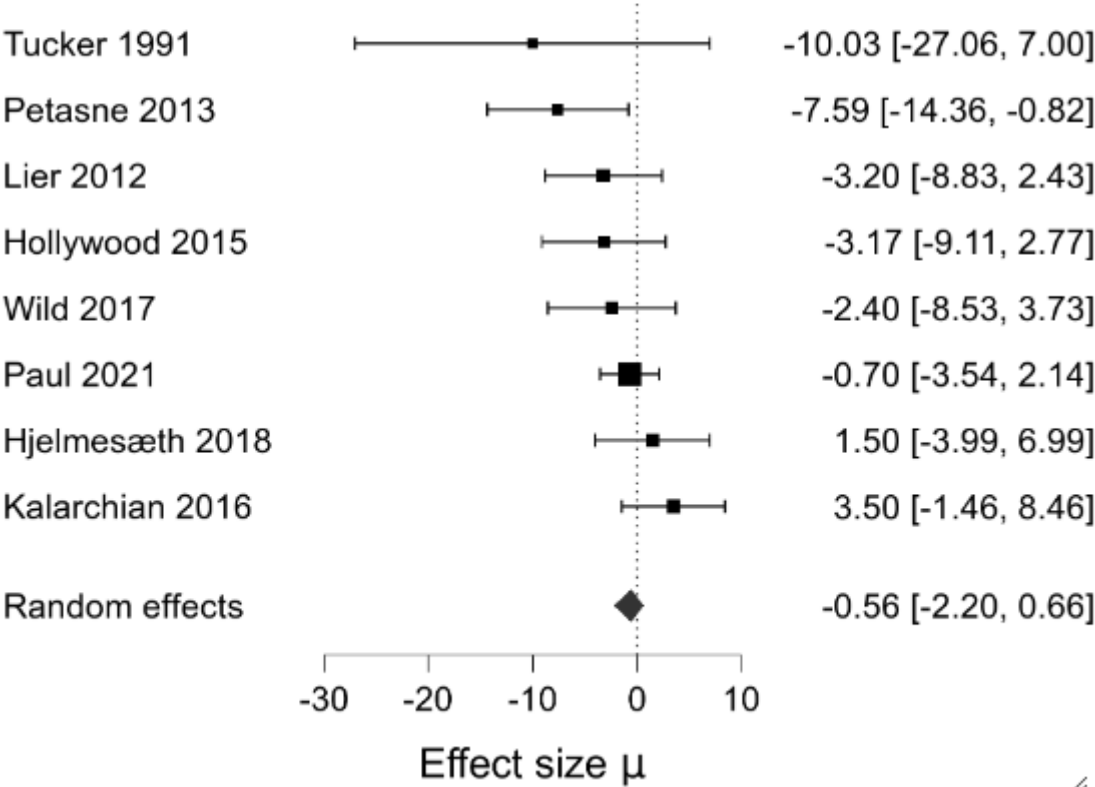

//

**Change in self-efficacy**

| Study ID                    | Follow-up                 | Experimental |      |       | Control group |      |       | Mean effect [95% CrI] | Tool | Score |     | Comments                                                  |
|-----------------------------|---------------------------|--------------|------|-------|---------------|------|-------|-----------------------|------|-------|-----|-----------------------------------------------------------|
|                             |                           | Mean         | SD   | Total | Mean          | SD   | Total |                       |      | Min   | Max |                                                           |
| Wild 2017                   | Baseline                  | 29.7         | 5.2  | 58    | 29.5          | 5.2  | 56    | 0.20 [-1.71, 2.11]    | GSE  | 0     | 40  | Higher units indicate higher general self-efficacy values |
|                             | 6 months after surgery    | 31.6         | 9.14 | 49    | 31.2          | 8.23 | 48    | 0.40 [-2.79, 3.59]    |      |       |     |                                                           |
|                             | 12 months after surgery   | 32.4         | 6.85 | 56    | 33.6          | 5.99 | 54    | -1.20 [-3.56, 1.16]   |      |       |     |                                                           |
|                             | 37.9 months after surgery | 33           | 5.62 | 39    | 30.3          | 5.32 | 35    | 2.70 [0.21, 5.19]     |      |       |     |                                                           |
| GSE - General Self-efficacy |                           |              |      |       |               |      |       |                       |      |       |     |                                                           |

**Change in quality of life**

| Study ID         | Follow-up               | Experimental |       |       | Control group |       |       | Mean effect [95% CrI]    | Tool        | Score |     | Comments                                                              |
|------------------|-------------------------|--------------|-------|-------|---------------|-------|-------|--------------------------|-------------|-------|-----|-----------------------------------------------------------------------|
|                  |                         | Mean         | SD    | Total | Mean          | SD    | Total |                          |             | Min   | Max |                                                                       |
| Paul 2021        | Baseline                | 12.5         | 2.9   | NR    | 13.3          | 2.8   | NR    | -0.8 (for total 125 pts) | WHOQoL-BREF | 4     | 20  | Physical health.<br>Higher units indicate higher quality of life      |
|                  | 12 months after surgery | 15.1         | 2.8   | NR    | 15.3          | 3.0   | NR    | -0.2 (for total 108 pts) |             |       |     |                                                                       |
|                  | Baseline                | 13.4         | 2.4   | NR    | 14.6          | 2.0   | NR    | -1.2 (for total 125 pts) |             | 4     | 20  | Psychological health.<br>Higher units indicate higher quality of life |
|                  | 12 months after surgery | 15.0         | 2.3   | NR    | 15.2          | 2.7   | NR    | -0.2 (for total 108 pts) |             |       |     |                                                                       |
|                  | Baseline                | 13.5         | 2.3   | NR    | 14.6          | 2.4   | NR    | -1.1 (for total 125 pts) |             | 4     | 20  | Social relations.<br>Higher units indicate higher quality of life     |
|                  | 12 months after surgery | 14.3         | 2.8   | NR    | 14.5          | 3.7   | NR    | -0.2 (for total 108 pts) |             |       |     |                                                                       |
|                  | Baseline                | 15.0         | 1.9   | NR    | 15.4          | 2.3   | NR    | -0.4 (for total 125 pts) |             | 4     | 20  | Environment.<br>Higher units indicate higher quality of life          |
|                  | 12 months after surgery | 15.6         | 2.2   | NR    | 15.5          | 3.1   | NR    | 0.1 (for total 108 pts)  |             |       |     |                                                                       |
| <u>Wild 2017</u> | Baseline                | 47.3         | 19.8  | 58    | 49            | 17.5  | 56    | -1.70 [-8.55, 5.15]      | SF-36       | 0     | 100 | Higher units indicate higher quality of life                          |
|                  | 6 months after surgery  | 70           | 30.46 | 49    | 69.4          | 27.69 | 48    | 0.60 [-10.08, 11.28]     |             |       |     |                                                                       |

|                                                                                                                                                                                                                                        |                           |      |       |    |      |       |    |                     |                                 |   |    |                                                            |
|----------------------------------------------------------------------------------------------------------------------------------------------------------------------------------------------------------------------------------------|---------------------------|------|-------|----|------|-------|----|---------------------|---------------------------------|---|----|------------------------------------------------------------|
|                                                                                                                                                                                                                                        | 12 months after surgery   | 79.2 | 30.46 | 56 | 75.8 | 26.19 | 54 | 3.40 [-7.02, 13.82] |                                 |   |    |                                                            |
|                                                                                                                                                                                                                                        | 37.9 months after surgery | 60.3 | 16.86 | 39 | 62.1 | 16.57 | 35 | -1.80 [-9.42, 5.82] |                                 |   |    |                                                            |
| <u>Hollywood 2015</u>                                                                                                                                                                                                                  | Baseline                  | 2.11 | 0.57  | 38 | 1.96 | 0.58  | 32 | 0.15 [-0.12, 0.42]  | SF-36, ADL                      | 0 | 10 | Higher units indicate major problems with ADLs             |
|                                                                                                                                                                                                                                        | 12 months after surgery   | 1.50 | 0.58  | 38 | 1.62 | 0.71  | 32 | -0.12 [-0.43, 0.19] |                                 |   |    |                                                            |
|                                                                                                                                                                                                                                        | Baseline                  | 3.96 | 0.77  | 38 | 4.22 | 0.58  | 32 | -0.26 [-0.58, 0.06] | SEIQoL                          | 1 | 10 | Higher units indicate higher quality of life               |
|                                                                                                                                                                                                                                        | 12 months after surgery   | 4.38 | 0.51  | 38 | 4.20 | 0.78  | 32 | 0.18 [-0.14, 0.50]  |                                 |   |    |                                                            |
|                                                                                                                                                                                                                                        | Baseline                  | 2.5  | 0.9   | 38 | 2.3  | 0.8   | 32 | 0.20 [-0.20, 0.60]  | Single item health status scale | 0 | ∞  | Odds ratio. Higher units indicate better self-rated health |
|                                                                                                                                                                                                                                        | 12 months after surgery   | 3.8  | 0.6   | 38 | 3.4  | 1.1   | 32 | 0.40 [-0.03, 0.83]  |                                 |   |    |                                                            |
| SF-36 - Short Form Health Survey, SEIQoL - Schedule for Evaluation of Individualised Quality of Life, ADL - Activities of Daily Living, WHOQoL-BREF - World Health Organization Quality of Life, pts – participants, NR – not reported |                           |      |       |    |      |       |    |                     |                                 |   |    |                                                            |

### Assessment of ‘non-normative’ eating patterns

| Study ID              | Follow-up                 | Experimental |      |       | Control group |      |       | Mean effect [95% CrI]    | Tool                   | Score |     | Comments                                                  |
|-----------------------|---------------------------|--------------|------|-------|---------------|------|-------|--------------------------|------------------------|-------|-----|-----------------------------------------------------------|
|                       |                           | Mean         | SD   | Total | Mean          | SD   | Total |                          |                        | Min   | Max |                                                           |
| <u>Wild 2017</u>      | Baseline                  | 9.8          | 3.4  | 58    | 10            | 3.7  | 56    | -0.20 [-1.51, 1.11]      | EDE                    | 0     | 168 | Higher scores indicate higher level of symptoms           |
|                       | 12 months after surgery   | 1.4          | 0.76 | 56    | 1.3           | 0.75 | 54    | 0.10 [-0.18, 0.38]       |                        |       |     |                                                           |
|                       | 37.9 months after surgery | 1.65         | 1.87 | 39    | 1.75          | 1.77 | 35    | -0.10 [-0.93, 0.73]      |                        |       |     |                                                           |
| <u>Hollywood 2015</u> | Baseline                  | 2.6          | 0.9  | 38    | 2.8           | 0.7  | 32    | -0.20 [-0.58, 0.18]      | DEBQ, emotional eating | 1     | 13  | Higher scores indicate higher levels of emotional eating  |
|                       | 12 months after surgery   | 1.6          | 0.5  | 38    | 1.9           | 0.7  | 32    | -0.30 [-0.59, -0.01]     |                        |       |     |                                                           |
| Paul 2021             | Baseline                  | 28.4         | 5.0  | NR    | 27.3          | 5.7  | NR    | 1.1 (for total 124 pts)  | DEBQ external eating   | 11    | 55  | Higher scores indicate higher levels of external eating   |
|                       | 12 months after surgery   | 31.4         | 7.7  | NR    | 30.7          | 7.3  | NR    | 0.7 (for total 106 pts)  |                        |       |     |                                                           |
|                       | Baseline                  | 32.4         | 6.1  | NR    | 31.0          | 6.2  | NR    | 1.4 (for total 124 pts)  | DEBQ restrained eating | 11    | 55  | Higher scores indicate higher levels of restrained eating |
|                       | 12 months after surgery   | 23.0         | 5.2  | NR    | 23.4          | 5.2  | NR    | -0.4 (for total 106 pts) |                        |       |     |                                                           |
|                       | Baseline                  | 31.6         | 10.4 | NR    | 26.5          | 8.3  | NR    | 5.1 (for total 124 pts)  | DEBQ emotional eating  | 11    | 55  | Higher scores indicate higher levels of emotional eating  |

|                                                                                                                                                                                                                                                                                   |                         |      |       |     |      |       |    |                          |                                          |    |     |                                                         |
|-----------------------------------------------------------------------------------------------------------------------------------------------------------------------------------------------------------------------------------------------------------------------------------|-------------------------|------|-------|-----|------|-------|----|--------------------------|------------------------------------------|----|-----|---------------------------------------------------------|
|                                                                                                                                                                                                                                                                                   | 12 months after surgery | 25.9 | 9.6   | NR  | 23.6 | 9.4   | NR | 2.3 (for total 106 pts)  | EDE total score                          | 0  | 132 | Higher scores indicate more severe eating disorder      |
|                                                                                                                                                                                                                                                                                   | Baseline                | 2.5  | 0.9   | NR  | 2.4  | 0.9   | NR | 0.1 (for total 126 pts)  |                                          |    |     |                                                         |
|                                                                                                                                                                                                                                                                                   | 12 months after surgery | 1.3  | 0.9   | NR  | 1.5  | 1.0   | NR | -0.2 (for total 109 pts) |                                          |    |     |                                                         |
| <u>Hjelmesæth 2018</u>                                                                                                                                                                                                                                                            | Baseline                | 30.5 | 18.6  | 48  | 49   | 18.3  | 50 | -18.50 [-25.81, -11.19]  | TFEQ-R-21, emotional eating              | 0  | 100 | The level of dysfunction is indicated by higher scores. |
|                                                                                                                                                                                                                                                                                   | 1 year after surgery    | 21.4 | 18.61 | 42  | 28.6 | 17.95 | 38 | -7.20 [-15.22, 0.82]     |                                          |    |     |                                                         |
|                                                                                                                                                                                                                                                                                   | 4 years after surgery   | 40.2 | 17.79 | 28  | 34.3 | 17.77 | 33 | 5.90 [-3.05, 14.85]      |                                          |    |     |                                                         |
|                                                                                                                                                                                                                                                                                   | Baseline                | 30.4 | 13.78 | 48  | 48.6 | 13.72 | 50 | -18.20 [-23.65, -12.75]  | TFEQ-R-21, uncontrolled eating           | 0  | 100 | The level of dysfunction is indicated by higher scores. |
|                                                                                                                                                                                                                                                                                   | 1 year after surgery    | 17.8 | 13.8  | 42  | 23.3 | 13.39 | 38 | -5.50 [-11.46, 0.46]     |                                          |    |     |                                                         |
|                                                                                                                                                                                                                                                                                   | 4 years after surgery   | 30   | 12.89 | 28  | 27.5 | 13.25 | 33 | 2.50 [-4.08, 9.08]       |                                          |    |     |                                                         |
|                                                                                                                                                                                                                                                                                   | Baseline                | 68.9 | 18.25 | 48  | 48.7 | 17.95 | 50 | 20.20 [13.03, 27.37]     | TFEQ-R-21, cognitive restraint of eating | 0  | 100 | The level of dysfunction is indicated by higher scores. |
|                                                                                                                                                                                                                                                                                   | 1 year after surgery    | 62.6 | 18.29 | 42  | 56.7 | 17.65 | 38 | 5.90 [-1.98, 13.78]      |                                          |    |     |                                                         |
|                                                                                                                                                                                                                                                                                   | 4 years after surgery   | 58.5 | 17.28 | 28  | 52.4 | 17.49 | 33 | 6.10 [-2.65, 14.85]      |                                          |    |     |                                                         |
| <u>Kalarchian 2016</u>                                                                                                                                                                                                                                                            | Baseline                | 4.8  | 19.7  | 103 | 3.1  | 12.2  | 84 | 1.70 [-2.91, 6.31]       | SBEs                                     | 0  | ∞   | Higher scores indicate more episodes                    |
|                                                                                                                                                                                                                                                                                   | 6 months after surgery  | 0.7  | 2.9   | 103 | 1.0  | 3.8   | 84 | -0.30 [-1.29, 0.69]      |                                          |    |     |                                                         |
|                                                                                                                                                                                                                                                                                   | Baseline                | 7.9  | 20.2  | 103 | 7.7  | 18.2  | 84 | 0.20 [-5.31, 5.71]       | OBEs                                     | 0  | ∞   | Higher scores indicate more episodes                    |
|                                                                                                                                                                                                                                                                                   | 6 months after surgery  | 0.7  | 3.0   | 103 | 1.3  | 4.2   | 84 | -0.60 [-1.67, 0.47]      |                                          |    |     |                                                         |
|                                                                                                                                                                                                                                                                                   | Baseline                | 70.7 | 10.6  | 103 | 70.1 | 9.7   | 84 | 0.60 [-2.31, 3.51]       | EBI                                      | 26 | 130 | Higher scores indicate higher level of symptoms         |
|                                                                                                                                                                                                                                                                                   | 6 months after surgery  | 89.2 | 12.2  | 103 | 81.5 | 10.6  | 84 | 7.70 [4.43, 10.97]       |                                          |    |     |                                                         |
| DEBQ - The dutch eating behaviour questionnaire, EDE - Eating Disorder Examination, TFEQ - Three Factor Eating Questionnaire, SBE - Subjective bulimic episodes past 28 days on EDE, OBE - Objective bulimic episodes past 28 days on EDE, EBI - Eating Behavior Inventory score. |                         |      |       |     |      |       |    |                          |                                          |    |     |                                                         |

### Change in psychological symptoms

| Study ID | Follow-up | Experimental |     |       | Control group |     |       | Mean effect [95% CrI] | Tool                      | Score |     | Comments                                                       |
|----------|-----------|--------------|-----|-------|---------------|-----|-------|-----------------------|---------------------------|-------|-----|----------------------------------------------------------------|
|          |           | Mean         | SD  | Total | Mean          | SD  | Total |                       |                           | Min   | Max |                                                                |
|          | Baseline  | 10           | 5.9 | 58    | 8.9           | 6.1 | 56    | 1.10 [-1.10, 3.30]    | Depression symptoms PHQ-9 | 0     | 27  | Asks for cognitive, affective, and somatic depression symptoms |

|                        |                           |       |      |     |       |      |    |                      |                  |   |      |                                                                                       |
|------------------------|---------------------------|-------|------|-----|-------|------|----|----------------------|------------------|---|------|---------------------------------------------------------------------------------------|
| <u>Wild 2017</u>       | 6 months after surgery    | 6     | 9.14 | 49  | 6.9   | 8.23 | 48 | -0.90 [-4.09, 2.29]  |                  |   |      |                                                                                       |
|                        | 12 months after surgery   | 4.1   | 6.85 | 56  | 5.3   | 5.99 | 54 | -1.20 [-3.56, 1.16]  |                  |   |      |                                                                                       |
|                        | 37.9 months after surgery | 5.8   | 4.37 | 39  | 8.2   | 4.73 | 35 | -2.40 [-4.48, -0.32] |                  |   |      |                                                                                       |
| <u>Hollywood 2015</u>  | Baseline                  | 2.8   | 0.9  | 38  | 2.9   | 0.8  | 32 | -0.10 [-0.50, 0.30]  | POMS, anxiety    | 0 | 36   | Higher scores indicate greater anxiety symptoms                                       |
|                        | 12 months after surgery   | 2.2   | 0.9  | 38  | 2.4   | 0.9  | 32 | -0.20 [-0.62, 0.22]  |                  |   |      |                                                                                       |
|                        | Baseline                  | 2.32  | 1.15 | 38  | 2.09  | 0.93 | 32 | 0.23 [-0.26, 0.72]   | POMS, depression | 0 | 60   | Higher scores indicate a greater number of depressive symptoms                        |
|                        | 12 months after surgery   | 1.48  | 0.7  | 38  | 1.81  | 0.8  | 32 | -0.33 [-0.69, 0.03]  |                  |   |      |                                                                                       |
| <u>Hjelmæsæth 2018</u> | Baseline                  | 4.9   | 2.76 | 48  | 7.3   | 2.82 | 50 | -2.40 [-3.50, -1.30] | HADS, anxiety    | 0 | 21   | Higher units indicate more probable impairment due to anxiety                         |
|                        | 1 year after surgery      | 4.4   | 2.57 | 42  | 6.2   | 2.74 | 38 | -1.80 [-2.97, -0.63] |                  |   |      |                                                                                       |
|                        | 4 years after surgery     | 6.8   | 2.58 | 28  | 5.8   | 2.54 | 33 | 1.00 [-0.29, 2.29]   |                  |   |      |                                                                                       |
|                        | Baseline                  | 2.5   | 3.1  | 48  | 5.0   | 2.82 | 50 | -2.50 [-3.67, -1.33] | HADS, depression | 0 | 21   | Higher units indicate more probable impairment due to depression                      |
|                        | 1 year after surgery      | 1.5   | 1.93 | 42  | 2.0   | 1.83 | 38 | -0.50 [-1.32, 0.32]  |                  |   |      |                                                                                       |
|                        | 4 years after surgery     | 3.4   | 2.58 | 28  | 1.9   | 2.54 | 33 | 1.50 [0.21, 2.79]    |                  |   |      |                                                                                       |
| <u>Kalarchian 2016</u> | Baseline                  | 15.2  | 10.3 | 103 | 14.0  | 8.9  | 84 | 1.20 [-1.55, 3.95]   | BDI              | 0 | 63   | Higher scores indicate a greater number of depressive symptoms                        |
|                        | 6 months after surgery    | 11.8  | 8.8  | 103 | 11.0  | 8.7  | 84 | 0.80 [-1.72, 3.32]   |                  |   |      |                                                                                       |
| <u>Petasne 2013</u>    | Baseline                  | 54.2% | -    | 72  | 58.3% | -    | 72 | 0.84 [0.44, 1.63]†   | BDI-II           | 0 | 100% | Percentage of participants who were experiencing depressive symptomatology in BDI-II. |
|                        | 6 months after surgery    | 41.7% | -    | 72  | 34.5% | -    | 72 | 1.19 [0.61, 2.32]†   |                  |   |      |                                                                                       |
|                        | 12 months after surgery   | 14.9% | -    | 67  | 31.8% | -    | 66 | 0.38 [0.16, 0.88]*   |                  |   |      |                                                                                       |
| Paul 2021              | Baseline                  | 6.3   | 4.4  | NR  | 4.8   | 3.0  | NR | 1.5                  | QIDS             | 0 | 48   | Higher scores indicate a greater number of depressive symptoms                        |
|                        | 12 months after surgery   | 4.6   | 3.7  | NR  | 4.6   | 3.3  | NR | 0                    |                  |   |      |                                                                                       |

† - odds ratio; PHQ-9 - Patient Health Questionnaire, HADS - Hospital Anxiety and Depression Scale, BDI - Beck Depression Inventory score, BSI - Brief Symptom Inventory, POMS - Profile of Mood States, QIDS - Quick Inventory of Depressive Symptomatology

a) Comparison between psychological intervention versus any control in the change of BMI at 1-2 years follow-up – mixed procedures

Forest Plot

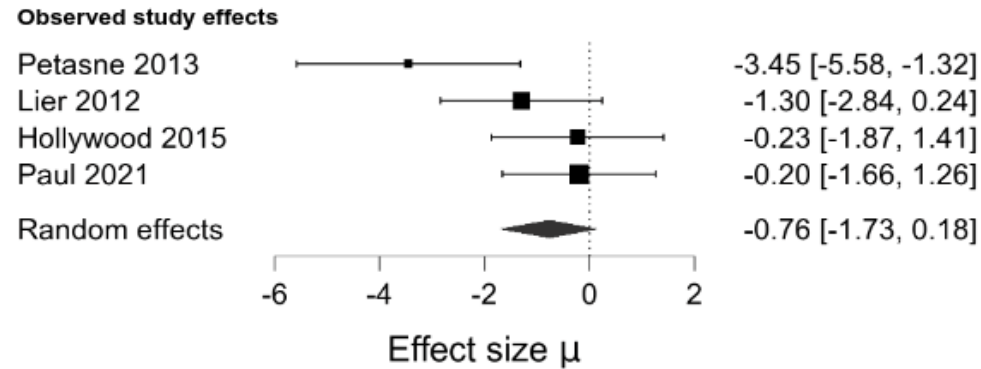

b) Comparison between psychological intervention versus any control in the change of BMI at 1-2 years follow-up– restrictive and mixed procedures

Posterior Estimates per Model

|                |        |        |       | 95% Credible Interval |       | BF <sub>01</sub>   |
|----------------|--------|--------|-------|-----------------------|-------|--------------------|
|                |        | Mean   | SD    | Lower                 | Upper |                    |
| Random effects | $\mu$  | -0.136 | 0.494 | -1.118                | 0.804 | 1.975              |
|                | $\tau$ | 0.309  | 0.390 | 0.039                 | 1.345 | 1.145 <sup>a</sup> |

Note.  $\mu$  and  $\tau$  are the group-level effect size and standard deviation, respectively.

<sup>a</sup> Bayes factor of the fixed effects  $H_1$  over the random effects  $H_1$ .

Forest Plot

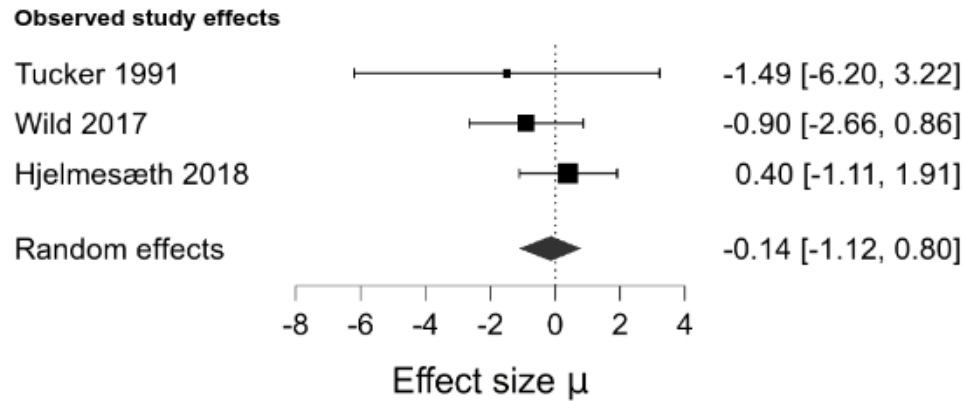

c) Comparison between psychological intervention versus any control in the change of BMI at the last follow-up – mixed procedures

Posterior Estimates per Model

|                |   |        | 95% Credible Interval |        |       |                    |
|----------------|---|--------|-----------------------|--------|-------|--------------------|
|                |   | Mean   | SD                    | Lower  | Upper | BF <sub>01</sub>   |
| Random effects | μ | -0.759 | 0.482                 | -1.726 | 0.204 | 0.460              |
|                | τ | 0.446  | 0.561                 | 0.043  | 1.997 | 0.913 <sup>a</sup> |

Note.  $\mu$  and  $\tau$  are the group-level effect size and standard deviation, respectively.

<sup>a</sup> Bayes factor of the fixed effects  $H_1$  over the random effects  $H_1$ .

### Forest Plot

#### Observed study effects

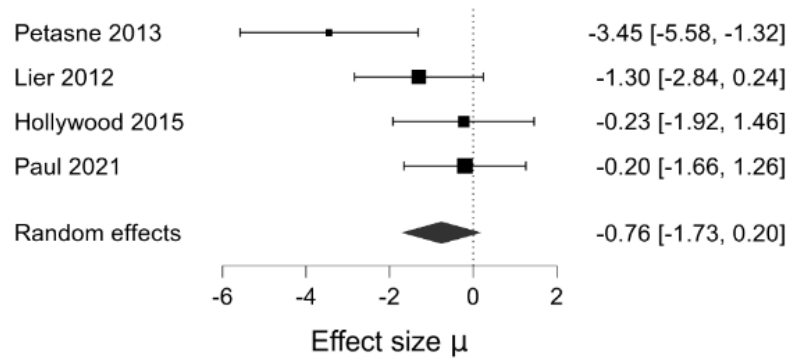

d) Comparison between psychological intervention versus any control in the change of BMI at the last follow-up – restrictive and mixed procedures

Posterior Estimates per Model

|                |   | 95% Credible Interval |       |        |       |                    |
|----------------|---|-----------------------|-------|--------|-------|--------------------|
|                |   | Mean                  | SD    | Lower  | Upper | BF <sub>01</sub>   |
| Random effects | μ | -0.058                | 0.507 | -1.098 | 0.950 | 1.910              |
|                | τ | 0.275                 | 0.312 | 0.039  | 1.157 | 1.191 <sup>a</sup> |

Note.  $\mu$  and  $\tau$  are the group-level effect size and standard deviation, respectively.

<sup>a</sup> Bayes factor of the fixed effects  $H_1$  over the random effects  $H_1$ .

### Forest Plot ▼

#### Observed study effects ▼

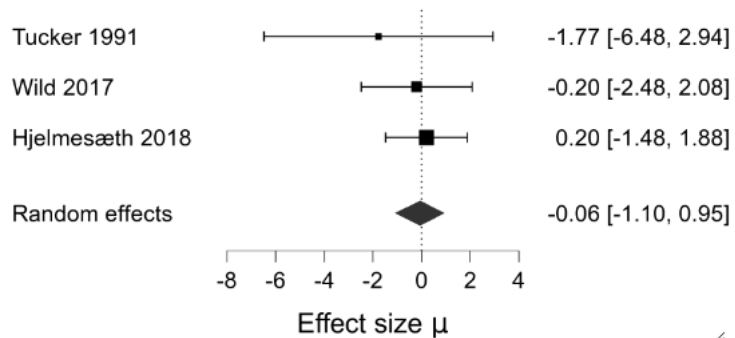

- e) Comparison between psychological intervention versus any control in the WL at 1-2 years follow-up– mixed procedures

Posterior Estimates per Model

|                |   | Mean   | SD    | 95% Credible Interval |       | BF <sub>01</sub>   |
|----------------|---|--------|-------|-----------------------|-------|--------------------|
|                |   |        |       | Lower                 | Upper |                    |
| Random effects | μ | -1.088 | 1.025 | -3.373                | 0.472 | 0.699              |
|                | τ | 0.438  | 0.746 | 0.040                 | 2.501 | 1.052 <sup>a</sup> |

Note.  $\mu$  and  $\tau$  are the group-level effect size and standard deviation, respectively.

<sup>a</sup> Bayes factor of the fixed effects  $H_1$  over the random effects  $H_1$ .

#### Forest Plot ▼

##### Observed study effects

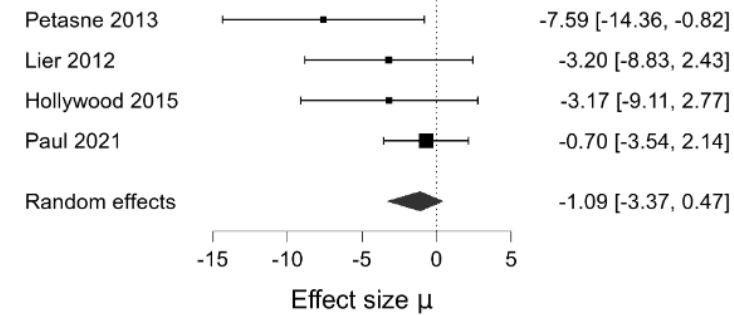

- f) Comparison between psychological intervention versus any control in the WL at 1-2 years follow-up– restrictive and mixed procedures

Posterior Estimates per Model

|                |   |       |       | 95% Credible Interval |       | BF <sub>01</sub>   |
|----------------|---|-------|-------|-----------------------|-------|--------------------|
|                |   |       |       | Lower                 | Upper |                    |
| Random effects | μ | 0.259 | 0.935 | -1.478                | 2.533 | 1.313              |
|                | τ | 0.436 | 0.707 | 0.040                 | 2.414 | 1.040 <sup>a</sup> |

Note.  $\mu$  and  $\tau$  are the group-level effect size and standard deviation, respectively.

<sup>a</sup> Bayes factor of the fixed effects  $H_1$  over the random effects  $H_1$ .

#### Forest Plot

##### Observed study effects

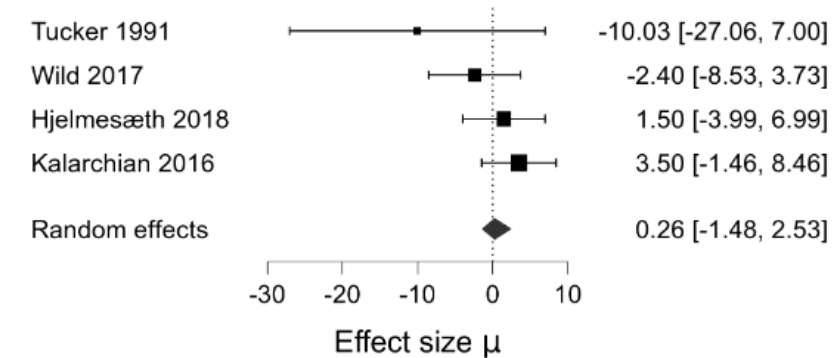

g) Comparison between psychological intervention versus any control in the WL at the last follow-up– mixed procedures

Posterior Estimates per Model

|                |        |        | 95% Credible Interval |        |       |                    |
|----------------|--------|--------|-----------------------|--------|-------|--------------------|
|                |        | Mean   | SD                    | Lower  | Upper | BF <sub>01</sub>   |
| Random effects | $\mu$  | -1.346 | 1.180                 | -3.967 | 0.439 | 0.579              |
|                | $\tau$ | 0.524  | 0.904                 | 0.041  | 3.246 | 1.002 <sup>a</sup> |

Note.  $\mu$  and  $\tau$  are the group-level effect size and standard deviation, respectively.

<sup>a</sup> Bayes factor of the fixed effects  $H_1$  over the random effects  $H_1$ .

**Forest Plot**

**Observed study effects**

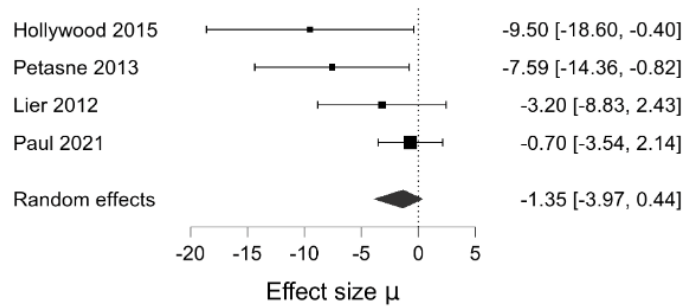

h) Comparison between psychological intervention versus any control in the WL at the last follow-up– restrictive and mixed procedures

Posterior Estimates per Model

|                |   | 95% Credible Interval |       |        |       |                  |
|----------------|---|-----------------------|-------|--------|-------|------------------|
|                |   | Mean                  | SD    | Lower  | Upper | BF <sub>01</sub> |
| Random effects | μ | 0.502                 | 1.016 | -1.168 | 3.023 | 1.180            |
|                | τ | 0.518                 | 0.945 | 0.040  | 2.998 | 1.006*           |

Note.  $\mu$  and  $\tau$  are the group-level effect size and standard deviation, respectively.

<sup>a</sup> Bayes factor of the fixed effects  $H_1$  over the random effects  $H_1$ .

**Forest Plot**

**Observed study effects**

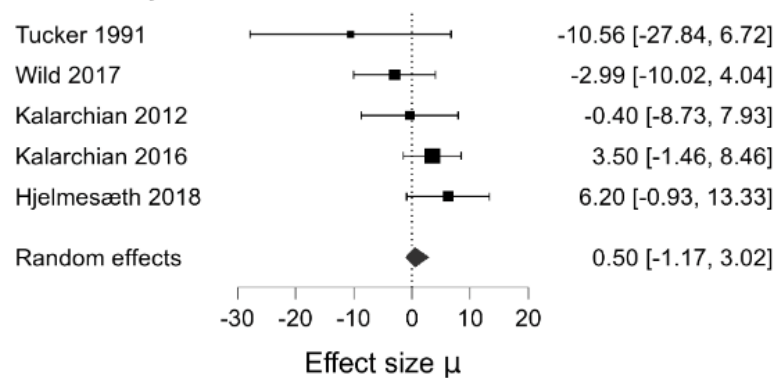

Supplement: Supplementary file 1 [file nutrients-14-01592-s001.zip › nutrients-1632484-supplementary.pdf]
